# Supplementary material for: A selectable, plasmid-based system to generate CRISPR/Cas9 gene edited and knock-in mosquito cell lines
Source: PubMed Central journal article supplement (PMC7804293; doi:10.1038/s41598-020-80436-5), 2021-01-12
Supplement: 41598_2020_80436_MOESM1_ESM.pdf [file 41598_2020_80436_MOESM1_ESM.pdf]

**Supplementary Information for:**

**A selectable, plasmid-based system to generate CRISPR/Cas9 gene edited and knock-in mosquito cell lines**

Kathryn Rozen-Gagnon<sup>1\*</sup>, Soon Yi<sup>1</sup>, Eliana Jacobson<sup>1</sup>, Sasha Novack<sup>1</sup>, and Charles M. Rice<sup>1</sup>

<sup>1</sup>Laboratory of Virology and Infectious Disease, The Rockefeller University, New York, NY 10065, USA

\*Corresponding author: Kathryn Rozen-Gagnon. Phone (212) 327-7009. Fax (212) 327-7048. krozen@rockefeller.edu

## Supplementary Methods (all references are numbered as in the main text)

### CRISPR/Cas9 plasmid generation

To replace the *dme* *hsp70* promoter (*hsp70Bb*<sup>47,52</sup>) in pDCC6 with the *Ae. aegypti* polyubiquitin promoter (*aae PUb*<sup>15,32,54</sup>), an *AfeI* site was introduced by site-directed mutagenesis using the QuikChange II XL kit (Agilent) and oligos RU-O-22971 and RU-O-22972. The region containing the *AfeI* site was then cloned into a clean pDCC6 background by digestion of the parental pDCC6 and pDCC6-*AfeI* with flanking sites *SapI*/*AvrII* followed by ligation, transformation, and DNA isolation. *Aae PUb* with flanking *AfeI*/*AvrII* sites was amplified using RU-O-22977 and RU-O-22978 and Phusion polymerase (NEB) from the plasmid pSL1180-HR-PUB-ECFP<sup>15,32</sup> (a gift from Leslie Vosshall; Addgene plasmid # 47917; <http://n2t.net/addgene:47917>; RRID:Addgene\_47917). The resulting plasmid, pKRG2 (pKRG2-dU6-PUB-3xFLAG-hSpCas9), contains the *dme* U6-2 promoter (*Drosophila* Pol III promoter *U6:96Ab*<sup>47,48</sup>) and the *aae PUb* promoter driving expression of hSpCas9.

To replace the *dme* U6-2 promoter with the *Aae. aegypti* U6 promoter (*aae U6*; AAEL017774<sup>57</sup>), we had to alter the sgRNA cloning sites due to an internal *BbsI* site in the *aae U6*. We designed primers to add an overhang corresponding to the *aae U6* to a modified sgRNA cloning site that relies on *BsmBI* to the pKRG2 sgRNA tracrRNA (trans-activating CRISPR RNA) scaffold and terminator sequence, with a downstream *AfeI* site (RU-O-22974 and RU-O-22975). The scaffold PCR and a gBlocks Gene Fragment containing the *aae U6* sequence and an upstream *SacI* site were assembled by Gibson assembly. The assembled DNA was PCR amplified using primers RU-O-22975 and RU-O-22976. The *aae U6* insert and pKRG2 were digested with *SacI*/*AfeI*, ligated, and DNA was isolated to obtain pKRG3-mU6-PUB-3xFLAG-hSpCas9, which contains the *aae U6* promoter driving sgRNA expression and the *aae PUb* promoter driving expression of hSpCas9.

We additionally generated a version of this plasmid with the 3xFLAG at the beginning of the Cas9 removed. To remove the 3xFLAG, we introduced a *NcoI* site by site-directed mutagenesis using oligos RU-O-23100 and RU-O-23101. We then cloned this mutagenized insert into a clean pKRG3 background by restriction enzyme digest with *BglIII/XhoI*. The pKRG3-*NcoI* plasmid was then digested with *NcoI* to remove the 3xFLAG and re-ligated to generate pKRG3-mU6-PUB-hSpCas9. We made another variation with the puromycin resistance cassette (pAc) added. We amplified the end of Cas9, the intervening T2A sequence<sup>59</sup>, and pAc from pAc-sgRNA-Cas9<sup>30</sup> (a gift from Ji-Long Liu; Addgene plasmid #49330; <http://n2t.net/addgene:49330>; RRID:Addgene\_49330) using primers RU-O-23782 and RU-O-23783. We then digested pKRG3 with *EagI/BsrGI* and generated pKRG3-mU6-PUB-hSpCas9-pAc by Gibson assembly. For comparative purposes, we also removed the 3xFLAG and added the pAc to hSpCas9 in pKRG3 by the same method, generating pKRG2-dU6-PUB-hSpCas9-pAc.

### 3xFLAG-tagged AGO1 plasmid generation

To generate overexpression plasmids as positive controls for mosquito AGO1 immunoblotting, the pKRG3 plasmid was further modified. Aag2 N-terminal 3xFLAG-tagged short and long AGO1 isoforms and the U4.4 N-terminal 3xFLAG-tagged AGO1 with pKRG3 plasmid overhangs were PCR-amplified from an in-house plasmid containing experimentally validated AGO1 sequences in each cell line (unpublished data). The hSpCas9 sequence was removed from pKRG3-mU6-PUB-hSpCas9-pAc by digestion with *NcoI/BsrGI* and AGO1 sequences were inserted by Gibson assembly. Alternatively, to generate an empty pKRG3 plasmid, the ends of the *NcoI/BsrGI*-digested plasmid were filled with T4 DNA polymerase (NEB) according to the manufacturer's protocol and blunt ends were re-ligated. Finally, the *aae U6* sequence was removed from pKRG3 Ago-containing or empty plasmids by digestion with *SapI/AfeI*; the ends were filled with T4 DNA polymerase and blunt ends were ligated. This generated an empty, all-purpose pKRG4-mPUB-pAc plasmid, as well as pKRG4-mPUB-3xFLAG-Aag2-AGO1-short-pAc, pKRG4-mPUB-3xFLAG-Aag2-AGO1-long-pAc, and pKRG4-mPUB-3xFLAG-U44-AGO1-pAc. To express Cre recombinase for excision of the fluorescent reporter between the loxP sites, Cre recombinase was amplified from pME66 (a gift from S. Sarbanes) using primers adding *SacI*/*AvrII* sites; the Cre insert and pKRG4-mPUB-pAc were digested with *SacI*/*AvrII* to generate pKRG4-mPUB-Cre-pAc.

### CRISPR guide RNA design and cloning

We designed CRISPR RNAs (crRNAs) corresponding to *AGO1*. For Aag2 cells, we used the *Ae. aegypti* AaegL3 genome assembly, AaegL3.3 annotations, AAEL012410 (at the time of the design this was the most updated

assembly; since that time the AaegL5 genome assembly has been released<sup>23</sup>, the *AGO1* gene ID remains the same and the updated AaegL5.2 gene annotation contains the correct *AGO1* transcriptional start site). For U4.4 cells, we used the *Ae. albopictus* AaloF1 assembly, AaloF1.2 annotations, *AALF020776*. We first confirmed the genomic sequence around the experimentally determined translational start site in each cell line (unpublished data from 5'RACE and cDNA sequencing). Aag2 and U4.4 cell genomic DNA was isolated using the DNeasy Blood & Tissue Kit (Qiagen) according to the manufacturer's protocol. Aag2 genomic DNA was amplified using primers RU-O-22776 and RU-O-22777, designed using the *Ae. aegypti* AaegL3 assembly, which has the correct annotated starting methionine. U4.4 genomic DNA was amplified using primers RU-O-22929 and RU-O-22931, designed using the *Ae. albopictus* AaloF1 assembly, where we could only identify a downstream methionine in 5'RACE experiments. Three guide oligos containing the *BsmBI* overhangs in pKRG3 plasmids were designed for each cell line based on protospacer adjacent motif (PAM) NGG sequences in close proximity to the starting methionine (RU-O-23427 to RU-O-23434, *Ae. aegypti*; RU-O-23456 to RU-O-23463, *Ae. albopictus*). The parent pKRG3-mU6-PUB-hSpCas9-pAc plasmid was digested with *BsmBI* and annealed oligos were ligated to generate 6 pKRG3 plasmids, one for each guide, according to protocols from Kistler et al., 2015 and Cornell's Stem Cell and Transgenic Core Facility (<https://transgenics.vertebrategenomics.cornell.edu/genome-editing.html>). These co-express the crRNA plus the tracrRNA as a single guide RNA (sgRNA), and hSpCas9.

#### *Cloning of homology-directed repair (HDR) donor template*

The pSL1180-HR-PUBeCFP plasmid was used as the backbone for cloning an HDR donor template. A 2kb homology arm fragment around the translational start site of *AGO1* in Aag2 cells was amplified from Aag2 genomic DNA using oligos RU-O-24703 and RU-O-24704, to add homology with the pSL1180-HR-PUBeCFP plasmid. We ordered a gBlocks Gene Fragment containing an inserted 3xFLAG-tag between the first methionine and the second amino acid of *AGO1*, with silent mutations to ablate the sgRNA PAM sites. The gBlock extended past *PpuMI/EagI* sites in the homology arm. Next, the homology arm was digested with *PpuMI/EagI* to drop out the central ~160 nt, generating 2 ~1kb homology fragments overlapping the gBlock. pSL1180-HR-PUBeCFP was digested with *NotI/EcoRI*, dropping out the PUB-eCFP, and the fragments were assembled to generate the intermediate plasmid pSL1180-HR-Aag2-3xFLAG-*AGO1*. Next, pSL1180-HR-Aag2-3xFLAG-*AGO1* was modified to add the loxP-PUB-RFP-loxP cassette, with overlaps corresponding to the upstream homology arm and downstream 3xFLAG-*AGO1* sequence. We generated four PCRs: PCR1) 5'HA-loxP primers = RU-O-25019 and RU-O-25020, template = pSL1180-HR-Aag2-3xFLAG-*AGO1* pSL1180-HR-Aag2-3xFLAG-*AGO1*); PCR2: loxP-PUB-RFP (primers= RU-O-25021 and RU-O-25022, template = pKRG3), PUB-RFP-loxP (primers = RU-O-25023 and RU-O-25024, template= pTRIPZ; Dharmacon), loxP-3xFLAG-3'HA (primers = RU-O-25027 and RU-O-25028, template = pSL1180-HR-Aag2-3xFLAG-*AGO1*). pSL1180-HR-Aag2-3xFLAG-*AGO1* was digested with *KpnI/PpuMI* and the fragments were assembled by Gibson assembly to generate pSL1180-HR-Aag2-loxP-PUB-RFP-loxP-3xFLAG-*AGO1*.

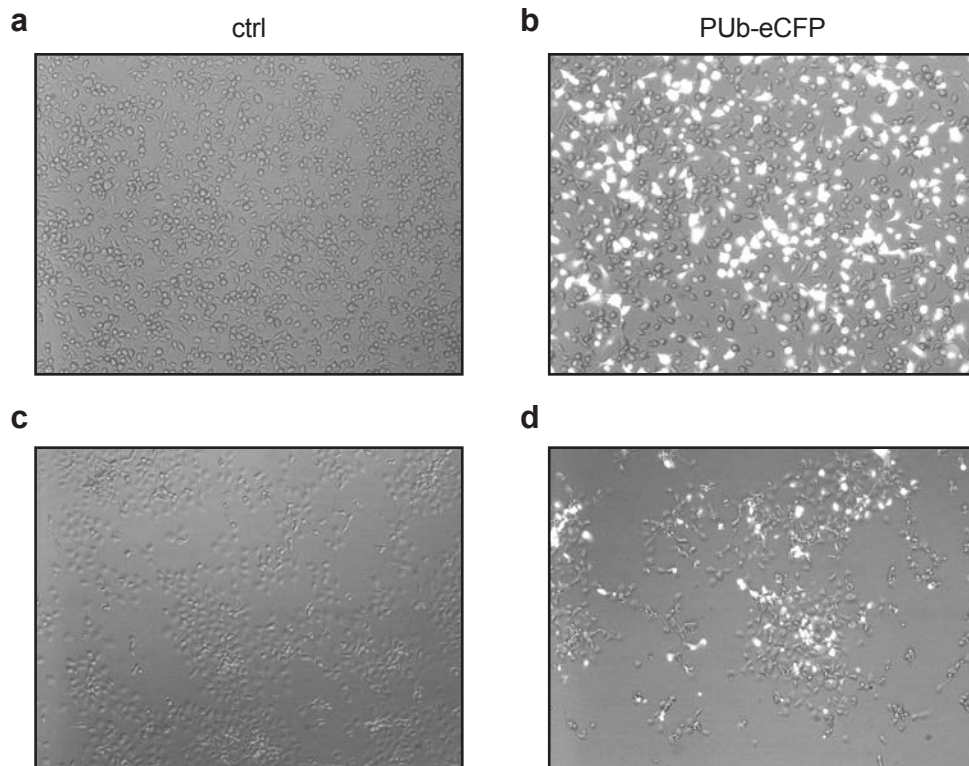

**Supplementary Figure 1. Efficient transfection of mosquito cells.**

(a) Representative merged brightfield and enhanced cyan fluorescent protein (eCFP) image for control (ctrl) U4.4 cells treated with transfection reagent alone.

(b) As in (a), for U4.4 cells transfected with PUB-eCFP.

(c) As in (a), for Aag2 cells.

(d) As in (b), for Aag2 cells.



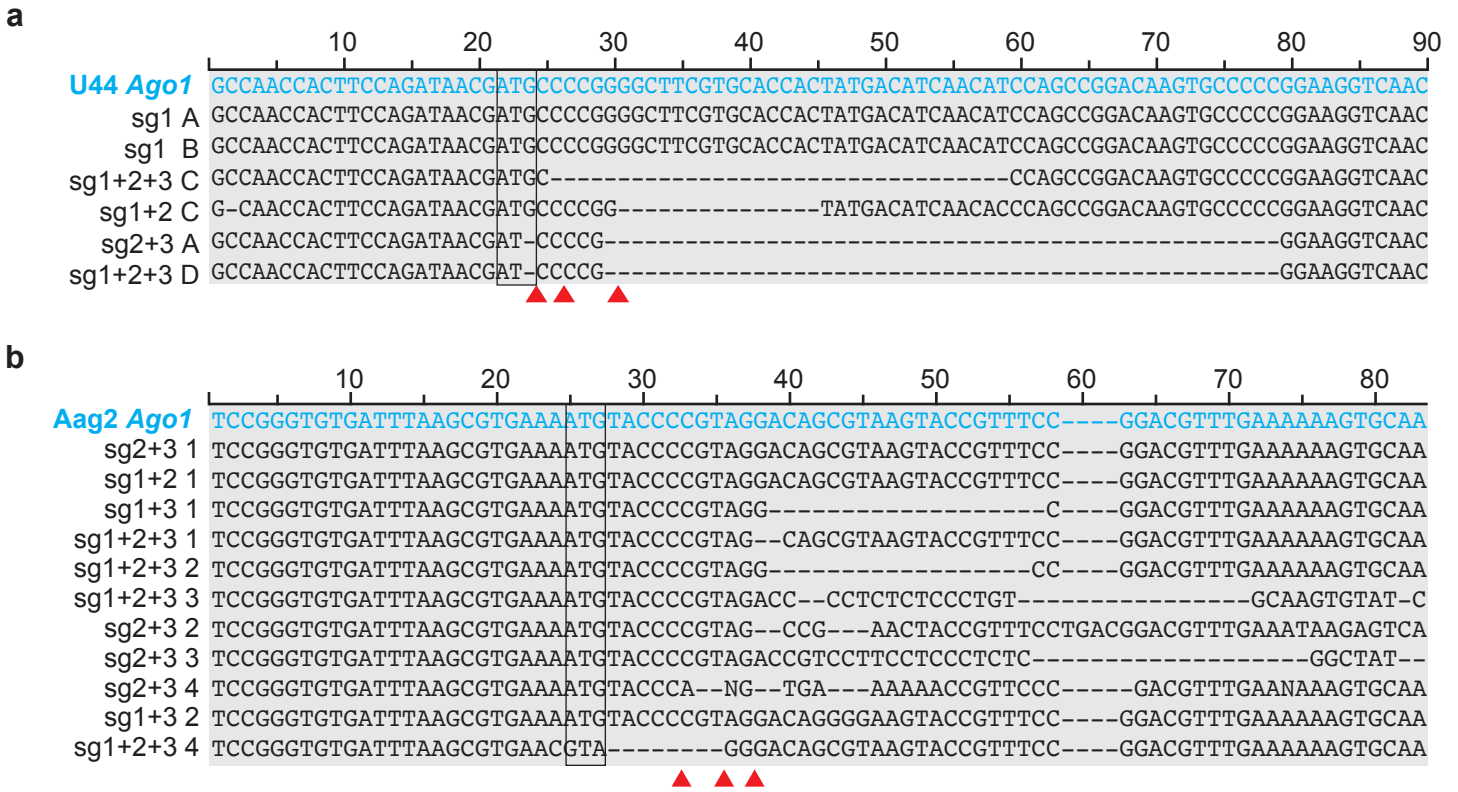

**Supplementary Figure 2. AGO1 sequences of single cell clones isolated after CRISPR/Cas9 transfection.**

(a) Representative alignment of AGO1 sequences from established U4.4 single cell clones. Clones were isolated and sequenced post-transfection with pKRG3 CRISPR/Cas9 plasmids containing guides targeting AGO1. sgRNA cleavage sites = red arrows; starting methionine = black box; reference sequence shown in blue.

(b) As in (a), for Aag2 cells.

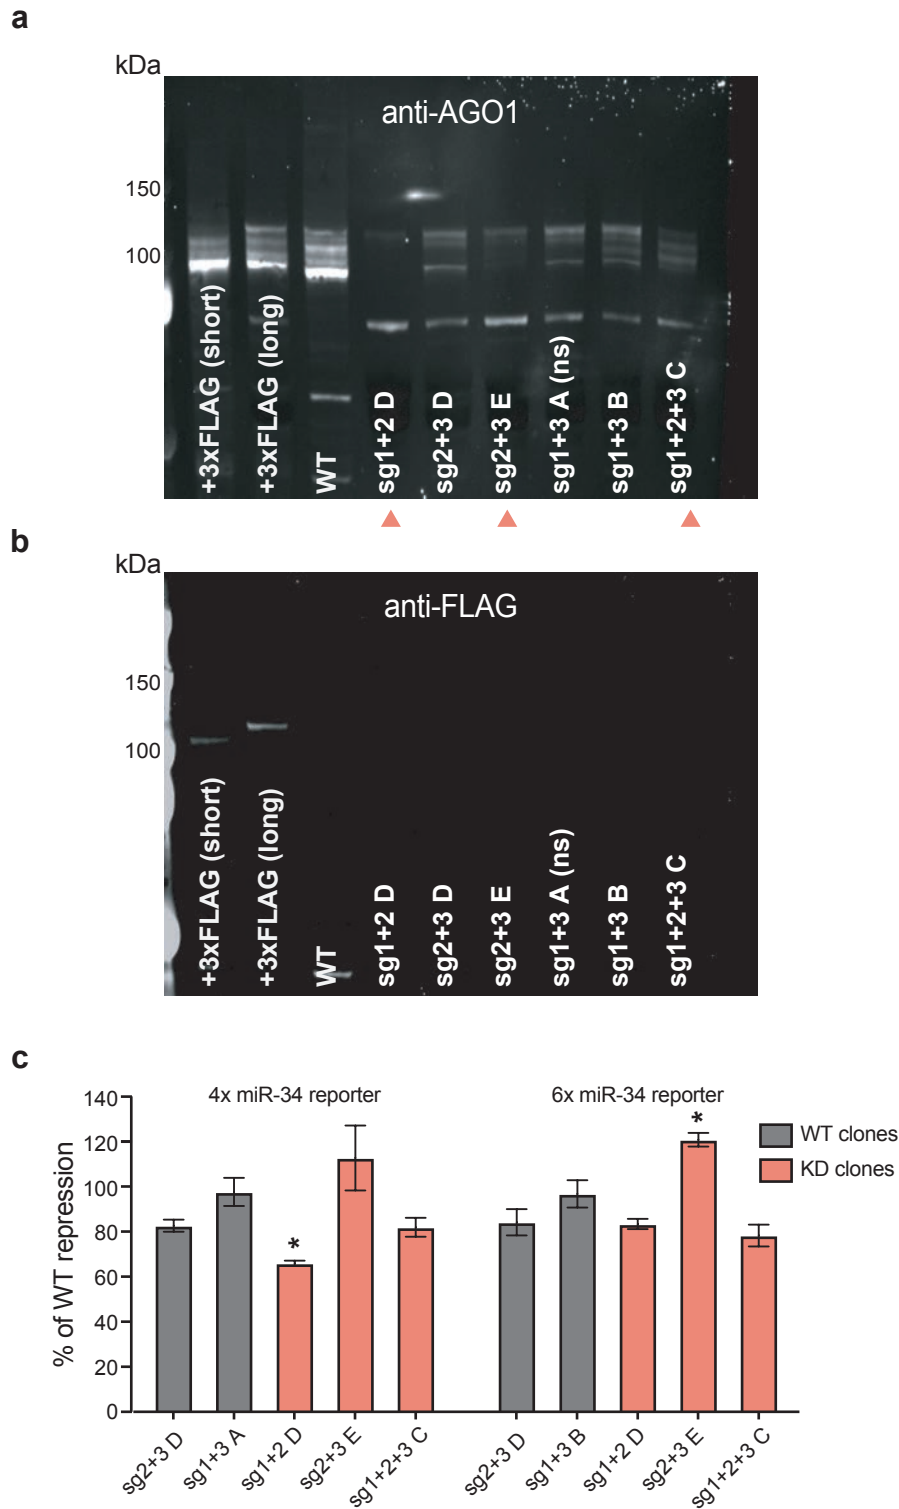

**Supplementary Figure 3. AGO1 protein levels and function in Aag2 clones.**

(a) Immunoblot of AGO1 showed Aag2 clones with wild-type (WT) and reduced (salmon arrows) AGO1 protein levels; A-E denote clones obtained from each sgRNA singly or in combination; ns = not shown (in reporter assay).

(b) 3xFLAG-tagged Aag2 AGO1 short and long isoforms were expressed and were detected by both the anti-AGO1 antibody in (a) and the anti-FLAG antibody.

(c) Luciferase reporter assay measuring miR-34 mediated repression of 4 or 6 repeated miR-34 sites (4x, 6x miR-34 reporter). Normalization was performed as in Fig. 3e. The percent (%) of repression compared to WT clones sg2+3 D and sg1+3 A is shown.  $P < 0.0001$  (overall ANOVA comparing different clones); individual groups were compared using the Dunnett's *post hoc* test compared to the WT clone sg1+3 B; \* $P < 0.05$ .

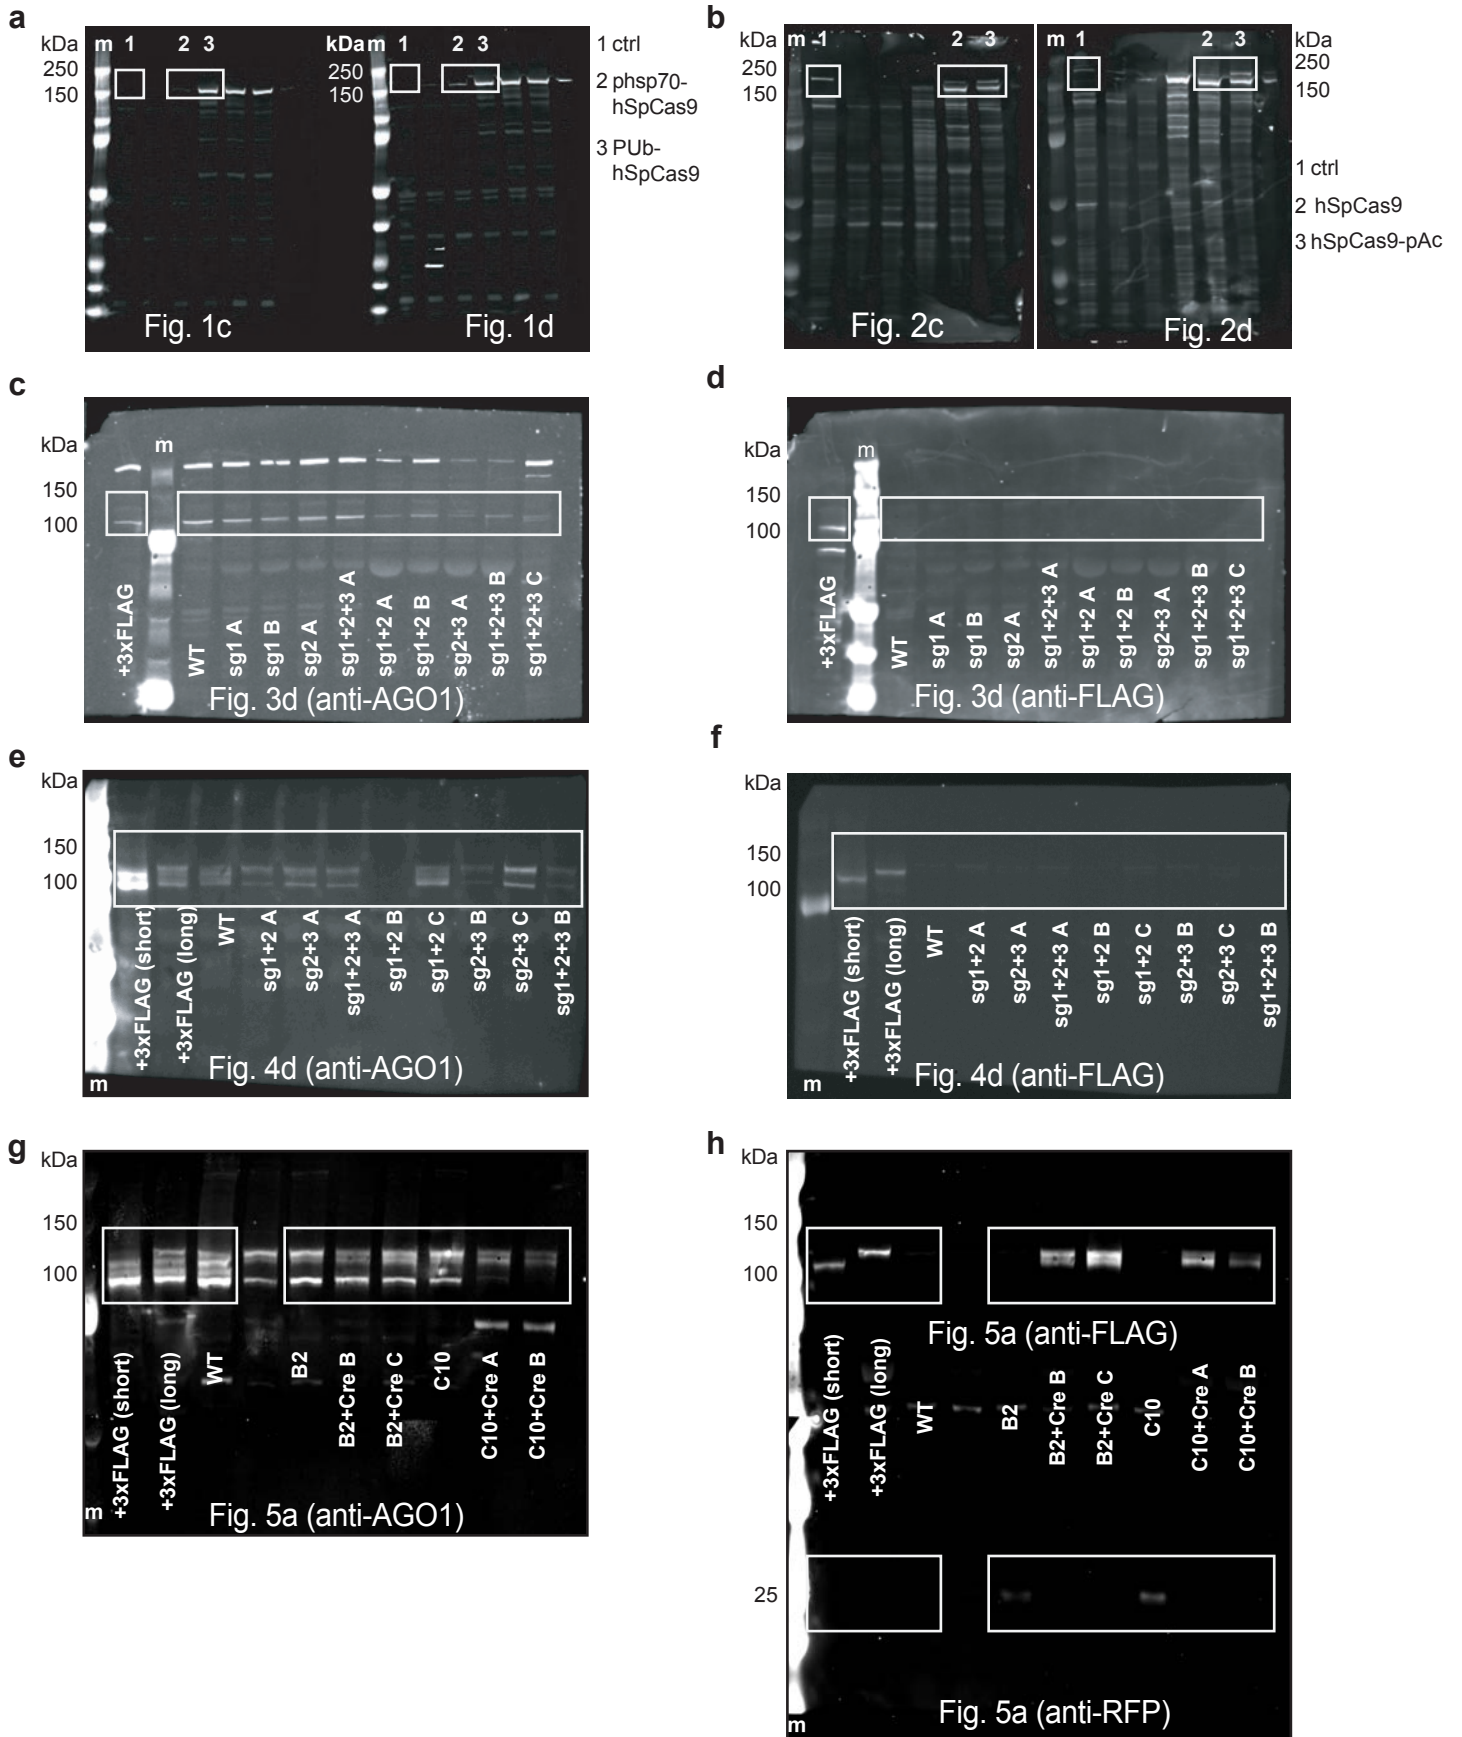

**Supplementary Figure 4. Full-length blots.**

(a-h) Full-length blots for all Figures. Regions included in Figures are indicated with boxes; m = marker, kDa = kilodaltons.

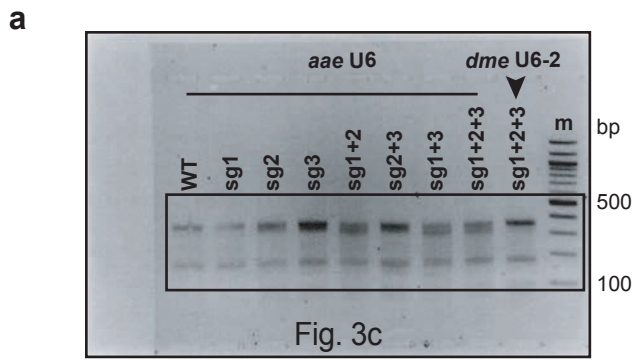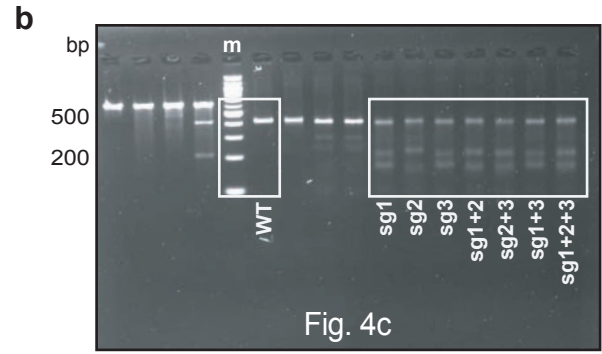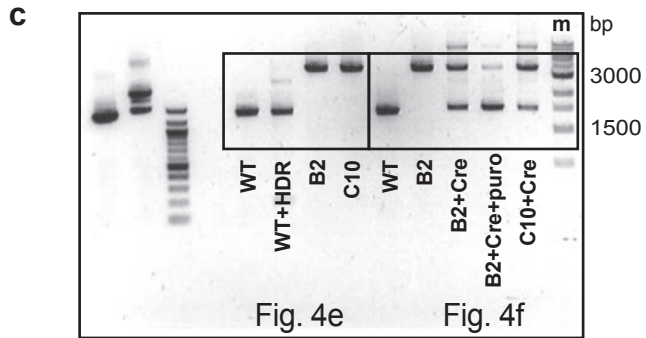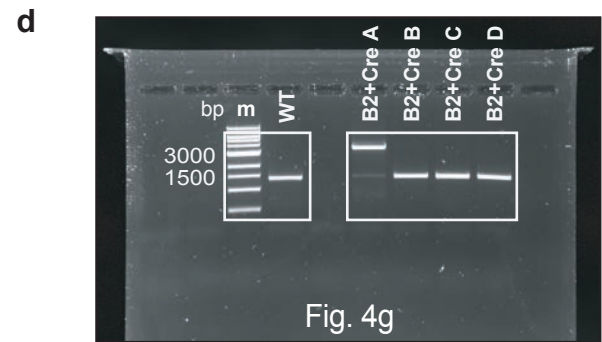

**Supplementary Figure 5. Full-length gels.**

(a-d) Full-length gels for all Figures. Regions included in Figures are indicated with boxes; m = marker, bp = base pairs.

## Supplementary Tables

**Supplementary Table 1. Sequences of all oligos used in this study.**

| Oligo ID                                           | Sequence                                                                                                                                                                                                                                                                            | Purpose                                                          |
|----------------------------------------------------|-------------------------------------------------------------------------------------------------------------------------------------------------------------------------------------------------------------------------------------------------------------------------------------|------------------------------------------------------------------|
| <i>pKRg cloning</i>                                |                                                                                                                                                                                                                                                                                     |                                                                  |
| RU-O-22971                                         | CTGCAGAATTGGCGCAAGCGCTAAAAACGGACT                                                                                                                                                                                                                                                   | introduce <i>AfeI</i> pDCC6 forward; PAGE-purified               |
| RU-O-22972                                         | AGTCCGTTTTAGCGCTTGGGCCAATCTGCAG                                                                                                                                                                                                                                                     | introduce <i>AfeI</i> pDCC6 reverse; PAGE-purified               |
| RU-O-22977                                         | GACAGCGCTTGGCCAAATTCGCAGACAAATGGCTATCTTTACATGTAGCTTGTGC<br>ATTG                                                                                                                                                                                                                     | Pub promoter PCR forward                                         |
| RU-O-22978                                         | GTCCCTAGGTGTATACCCTCCGGAAGCGCCACTCGAGATTCGAACAAGCTTATCGA<br>GCTTGGTGTGAAATCTCTGTTGAGC                                                                                                                                                                                               | Pub promoter PCR reverse                                         |
| RU-O-22974                                         | GACGAAGACTATATAAGAGCAGAGGCAAGAGTAGTAAATGGAGACGACTCTCTG<br>TTTTAGAGCTAGAAATAGC                                                                                                                                                                                                       | tracr RNA scaffold PCR forward                                   |
| RU-O-22975                                         | GCAGAATTGGCGCAAGCGCTGTC                                                                                                                                                                                                                                                             | tracr RNA scaffold & assemble <i>aae</i> U6/scaffold PCR reverse |
| RU-O-22976                                         | GACGAAGAGCGCCCAATACGCCAA                                                                                                                                                                                                                                                            | assemble <i>aae</i> U6/scaffold PCR forward                      |
| gBLOCK <i>aae</i> U6                               | GAAGAGCGCCCAATACGCCAAACCGCTCTCCCGGGGTTGGCCGATTCATTAATG<br>CAGGCCAATCGTGAAGTAGGCGGATCAGCGAATGAAATCGCCCATCGAGTTGAT<br>ACGTCCATCCATCGCTAGAACCCGCTTCGCTGTAGAACTATATAAGAGCAGAGG<br>CAAGAGTAGTAAATGGAGAGC                                                                                 | U6 geneblock                                                     |
| RU-O-23101                                         | GATATTGATTACAAAGACGATGACGATACCATTGGCCCCAAGAAG                                                                                                                                                                                                                                       | introduce <i>NcoI</i> remove 3xFLAG forward; PAGE-purified       |
| RU-O-23100                                         | CTTCTTTGGGGCCATGGTATCGTCATCGTCTTTGTAATCAATATC                                                                                                                                                                                                                                       | introduce <i>NcoI</i> remove 3xFLAG reverse; PAGE-purified       |
| RU-O-25485                                         | GACCCTAGGATGGGCCAAAGAAG                                                                                                                                                                                                                                                             | Cre into pKRg4 forward                                           |
| RU-O-25486                                         | CGGTAGAGCTCATCGCCATCTCCAG                                                                                                                                                                                                                                                           | Cre into pKRg4 reverse                                           |
| <i>sgRNA oligos</i>                                |                                                                                                                                                                                                                                                                                     |                                                                  |
| RU-O-23427                                         | AAATGGTACTTACGCTGTCCCTACG                                                                                                                                                                                                                                                           | pKRg Aag2 Ago1 sgRNA 1 forward                                   |
| RU-O-23428                                         | AAACCGTAGGACAGCGCTAAGTACC                                                                                                                                                                                                                                                           | pKRg Aag2 Ago1 sgRNA 1 reverse                                   |
| RU-O-23430                                         | AAATGAGCGTGAAATGTACCCCGT                                                                                                                                                                                                                                                            | pKRg Aag2 Ago1 sgRNA 2 forward                                   |
| RU-O-23431                                         | AAACACGGGTACATTTTCACGCTC                                                                                                                                                                                                                                                            | pKRg Aag2 Ago1 sgRNA 2 reverse                                   |
| RU-O-23433                                         | AAATGACGGTACTTACGCTGTCCCTA                                                                                                                                                                                                                                                          | pKRg Aag2 Ago1 sgRNA 3 forward                                   |
| RU-O-23434                                         | AAACTAGGACAGCGTAAGTACCGTC                                                                                                                                                                                                                                                           | pKRg Aag2 Ago1 sgRNA 3 reverse                                   |
| RU-O-23456                                         | AAATGTAGTGGTGCACGAAGCCCG                                                                                                                                                                                                                                                            | pKRg U4.4 Ago1 sgRNA 1 forward                                   |
| RU-O-23457                                         | AAACCGGGCTTCGTGCACCACTAC                                                                                                                                                                                                                                                            | pKRg U4.4 Ago1 sgRNA 1 reverse                                   |
| RU-O-23459                                         | AAATGTTCCAGATAACGATGCCCG                                                                                                                                                                                                                                                            | pKRg U4.4 Ago1 sgRNA 2 forward                                   |
| RU-O-23460                                         | AAACCGGGCATCGTTATCTGGAAC                                                                                                                                                                                                                                                            | pKRg U4.4 Ago1 sgRNA 2 reverse                                   |
| RU-O-23462                                         | AAATGACTTCCAGATAACGATGCC                                                                                                                                                                                                                                                            | pKRg U4.4 Ago1 sgRNA 3 forward                                   |
| RU-O-23463                                         | AAACCGGCATCGTTATCTGGAAGTC                                                                                                                                                                                                                                                           | pKRg U4.4 Ago1 sgRNA 3 reverse                                   |
| <i>HDR donor template oligos</i>                   |                                                                                                                                                                                                                                                                                     |                                                                  |
| RU-O-24703                                         | GACCATGATTACGAATTCGACATGTAGGACATGTGGGG                                                                                                                                                                                                                                              | Aag2 HA PCR forward                                              |
| RU-O-24704                                         | CCAGCTGCAGGGCGCCGCCACCGATTGCTTTTCGTC                                                                                                                                                                                                                                                | Aag2 HA PCR reverse                                              |
| gBLOCK Aag2 HDR donor template                     | CGAAAAGTGCAAAAATTCGGCCGTAATTAGTTCGCTTCCGTTTTTCCGAGTGCCCTC<br>CGATCGTTAGCGGACCGTTCGGGGTGTGATTTAAGCGTGAATGGATTACAAGGA<br>TCACGATGGAGATTACAAGGATCAGCATATCGATTACAAGGATGATGATAAGTATC<br>CGGTGGTCAACGTAAGTACCGTTTCCGGAGCTTTGAAAAAAGTCAATTCACAAG<br>AGAAGAAAAAAGTGTGACGAGGGGACCTTCTCTCCCTC |                                                                  |
| RU-O-25019                                         | GGAGCGTCCGTAAAATGAAA                                                                                                                                                                                                                                                                | <i>Kpn1</i> HA overlap forward                                   |
| RU-O-25020                                         | ATAACTTCGTATAGCATACATTATACGAAGTTATTTTCACGCTTAAATC                                                                                                                                                                                                                                   | 5'HA add loxP reverse                                            |
| RU-O-25021                                         | GCTATACGAAGTTATTTATCTTTACATGTAG                                                                                                                                                                                                                                                     | loxP-Pub forward                                                 |
| RU-O-25022                                         | GATCAGCTCGCTCATGCGGCCGCGGTAGAGCTCCGAATTCAC                                                                                                                                                                                                                                          | pUB-RFP reverse                                                  |
| RU-O-25023                                         | ATGAGCGAGCTGATC                                                                                                                                                                                                                                                                     | RFP forward                                                      |
| RU-O-25024                                         | CATTATACGAAGTTATTAATTAATTATCTGTGCCCCAG                                                                                                                                                                                                                                              | RFP-loxP reverse                                                 |
| RU-O-25027                                         | ATAACTTCGTATAATGTATGCTATACGAAGTTATATGGATTACAAGGATC                                                                                                                                                                                                                                  | loxP-HA forward                                                  |
| RU-O-25028                                         | AGAGACGAGAGGGAGGAAGG                                                                                                                                                                                                                                                                | HA <i>PpuMI</i> overlap reverse                                  |
| <i>Sequencing, surveyor &amp; integration PCRs</i> |                                                                                                                                                                                                                                                                                     |                                                                  |
| RU-O-26075                                         | ACTTGTCTCACTCGCATCATAACG                                                                                                                                                                                                                                                            | Aag2 HDR PCR F                                                   |
| RU-O-26076                                         | CGATCAGATCGCAGCAAAAAT                                                                                                                                                                                                                                                               | Aag2 HDR PCR R                                                   |
| RU-O-22776                                         | ACTTGTCTCACTCGCCATCA                                                                                                                                                                                                                                                                | Aag2 surveyor/sequencing forward                                 |
| RU-O-22777                                         | GTCCGTACACAGGAAAAGCC                                                                                                                                                                                                                                                                | Aag2 surveyor/sequencing reverse                                 |
| RU-O-22929                                         | GCCAACCATTCCAGATAACG                                                                                                                                                                                                                                                                | U4.4 surveyor forward                                            |
| RU-O-24042                                         | AGGATGGCATCGTACGGAAT                                                                                                                                                                                                                                                                | U4.4 surveyor reverse                                            |
| RU-O-22930                                         | TCTACCGGTGTTCACTGTGTC                                                                                                                                                                                                                                                               | U4.4 sequencing forward                                          |
| RU-O-22931                                         | TGATCTCCCGGTTGACCTTC                                                                                                                                                                                                                                                                | U4.4 sequencing reverse                                          |
| <i>Reporter cloning oligos</i>                     |                                                                                                                                                                                                                                                                                     |                                                                  |
| RU-O-24800                                         | TCGAGCAACCAGTAGGCCACTGCCACCGCAACCAGCTAGGCCACTGCCACCGGC<br>AACCAGCTAGGCCACTGCCACCGCAACCAGCTAGGCCACTGCCAGC                                                                                                                                                                            | Aag2 miR-34-5p 4x ideal psiCHECK2 forward                        |
| RU-O-24801                                         | GGCCGCTGGCAGTGGCCTAGTGGTTGGCGTGGCAGTGGCCTAGTGGTTGCCCG<br>TGGCAGTGGCCTAGTGGTTGGCGTGGCAGTGGCCTAGCTGGTTGC                                                                                                                                                                              | Aag2 miR-34-5p 4x ideal psiCHECK2 reverse                        |
| RU-O-24794                                         | TCGAGCAACCAGCTAACCACTGCCAGC                                                                                                                                                                                                                                                         | Aag2 miR-34-5p perfect psiCHECK2 forward                         |
| RU-O-24795                                         | GGCCGCTGGCAGTGGTGTAGCTGGTTGC                                                                                                                                                                                                                                                        | Aag2 miR-34-5p perfect psiCHECK2 reverse                         |

HA = homology arm; HDR = homology-directed repair; tracr = trans-activating CRISPR; sgRNA = single-guide RNA. All oligos were ordered in standard desalted format from IDT, unless indicated otherwise.

## Plasmid Sequences

## pKR3-mU6-PUB-3xFLAG-hSpCas9

a<sub>a</sub>e U6

*B*bsI sites for sgRNA cloning

sgRNA tracrRNA and U6 terminator

a<sub>a</sub>e PUB promoter

3xFLAG

NLS

hSpCas9

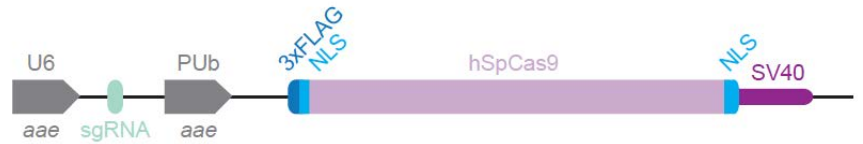

```
GCGCCCAATACGCAAACCGCCTCTCCCCGCGGGTTGGCCGATTTCATTAATGCAGGCAACTCGTGAAAAGGTAGGCGGATCAGCGAATGAA
ATCGCCCATCGAGTTGATACGTCCATCCATCGCTAGAACC GGTTCGCTGTAGAAGACTATATAAGAGCAGAGGCAAGAGTAGTGAAAT
gGAGACGaCGTCTCtGTTTTAGAGCTAGAAATAGCAAGTTAAAATAAAGGCTAGTCCGTTATCAACTTGAAAAAGTGGCACCGAGTCGGT
GCTTTTTTGTAGAGCTAGAAATAGCAAGTTAAAATAAAGGCTAGTCCGTTTTAGCGCTTGCGCCAATTCTGCAGACAAATGGCTAT
CTTTACATGTAGCTTGTGCATTTGAATCCAATTATAATTTGCCTTGGCACCAGCTGAGCCAGACAAGAAAAGAAAGCTTCCCAGAAGTATA
TCGATTTAGAAGGGTTGACGTCACTTGTCTGACTGCCTAATACAGCAAATGATGCAATTAGAATGATTCAAGTGAAATTTCCAAATTTAC
TGATTTTCTCTGGATTTGGTTATCAGATTACATTCGAAGCTAAGATTAGCTACCGAAATTTGTCGATCAAATCAGGAAATCCTTTCTCT
ATCGAAAAAGGCATTCGCACATCTTCTCTCTATGCCATATACACGAAGGGTAGGTACATTGACGTCTTTGCCAGAAGTTGAACTGCAT
CGTTCAAGGTACAGAATGAACGACTAACAGACACAAGCACGTTTTGCTGTCCATTTCAGACACAGGGATGGTACCCATATTCGATCGATA
TAGAGCCATCCAACCGAACAGAGGTATATGTATGAATGTATTGCTGAAATTTTCTAGAAGTACAACCACCTACGACAGTGTCTATAA
AACGCCCCTGCAAAGGCGAAACCAGCTCAATCGAATACGTTTTCTAGTGGAGTGAACATTACGCGGCCCAAGTAAGCAGTGCCAGTGCA
AGTGAAGTGAAGTCTCTAGTGA AAAAGAGTGTCCAATTAGCCAGAGGAGAAAATTTTCAGAGTGAACAAAGCTTTATTCAAAGGACAAT
TACTATTAATTTGGTGAAAGTGCATTTCCGTTGAAGGGAATCTTCTAGTGAAGGTAGGTAAATTAATTGATGAAATTTATAGCTATGAGCG
AAAAGTGTGTTGGTGAATGATTCCTTTGTCTTTGAATGAGCAAATTTTCCAAGATGGCGACTATTGAGCTTTGAGTGAATGAGTAA
AATTTGCAACGCAGTTTCATCATCATTGATAAAAACCAATTTGTGATTCACAGCGATAATCATATTTGTTGAATCATCGCTACTAATTTG
AATTAATTTCTAGAATAATAAGAATAACGATTTGCTCCGTCACATATCTAAAATAAATATTTTGATGGTTAATTACCCATTAAGGTA
ATATTAACACATATCGAGAAAACCTTGAGGAAATCTGAGAAAATTTGAAGATAACGCAATTTCAAAAATCAGTAGTTCAAAGTCAAAAAC
AAGTTAATTTTTCACCTAAAAGTAGGGCGTTGTTGTGCTGACGCTCACTCAAGTGTATATTTTTCACCTGGCCGTCGACTGCAAAACG
AGACAAAGCAAACAAGTTTAAAACCTGTCTGTCTGTCTGAAAGCCAAAGGCAATGAATCAATATCAAATGAGAGTTTGCATTTTACA
ACCAATTACTCAAGCGTTTCTCTGTTTTTCTGCTCAACAGAGATTTCAACA CCAAGCTCGATAAGCTTGTTCGAATCTCGAGTGC
GCGCTTCCGGAGGTATACACCTAGGCGGTACCCTGCAGTGAATTCGGAGCTCTACCGGTGCCACCATGGACTATAAGGACCACGACGG
AGACTACAAGGATCATGATATTGATTACAAAGACGATGACGATAAGATGGCCCCAAGAAGAAGCGGAAGGTGGTATCCACGGAGTCC
CAGCAGCCGACAAGAAGTACAGCATCGGCCTGGACATCGGCACCAACTCTGTGGGCTGGGCGTGATCACCGACGAGTACAAGGTGCC
AGCAAGAAATTCAGGTGCTGGGCAACACCGACCGGCACAGCATCAAGAAGAACCTGATCGGAGCCCTGCTGTTTCGACAGCGGCGAAAC
AGCCGAGGCCACCCGGCTGAAGAGAACC GCCAGAAGAAGATACACCAGACGGAAGAACCGGATCTGCTATCTGCAAGAGATCTTCAGCA
ACGAGATGGCCAAGGTGGACGACAGCTTCTTCCACAGACTGGAAGAGTCTTCTGGTGGAAAGAGGATAAGAAGCACGAGCGGCACCCC
ATCTTCCGCAACATCGTGGACGAGGTGGCCTACCACGAGAAGTACCCACCATCTACCACCTGAGAAAAGAACTGGTGGACAGCACCGA
CAAGGCCGACCTGCGGCTGATCTATCTGGCCCTGGCCACATGATCAAGTTCCGGGGCCACTTCTGATCGAGGGCGACCTGAACCCCG
ACAACAGCAGCATGGACAAGCTGTTTCATCCAGCTGGTGCAGACTACAACAGCTGTTTCGAGGAAAACCCCATCAACGCCAGCGGCGT
GACGCCAAGGCTCTGTCTGCCAGACTGAGCAAGAGCAGACGCTGGAATACTGATCGCCAGCTGCCCGGCGAGAAGAAGATTTGG
CCTGTTTCGAAACCTGATGTCCTGACCTGGGCTGAGCCCAACTTCAAGAGCAACTTCGACCTGGCCGAGGATGCCAAACTGCAGC
TGAGCAAGGACACCTACGACGACGACCTGGACAACCTGCTGGCCAGATCGGCGACCAGTACGCCGACCTGTTTCTGGCCGCAAGAAC
CTGTCCGACGCCATCTGCTGAGCGACATCCTGAGAGTGAACACCGAGATCACCAAGGCCCCCTGAGCGCCTCTATGATCAAGAGATA
CGACGAGCACCACCAGGACCTGACCCTGCTGAAAAGCTCTCGTGGCCGAGCAGCTGCCTGAGAAGTACAAAAGAGATTTTCTTCGACCAGA
GCAAGAACGGCTACGCCGGCTACATTGACGGCGGAGCCAGCCAGGAAGAGTTCTACAAGTTTCATCAAGCCCATCTGGAAAAGATGGAC
GGCACCGAGGAACTGCTCGTGAAGCTGAACAGAGAGGACCTGCTGCGGAAGCAGCGGACCTTCGACAACGGCAGCATCCCCACCGAT
CCACCTGGGAGAGCTGCACGCCATTTCTGCGGCGGAGGAAGATTTTTTACCATTCTGAAAGGACAACCGGGAAAAGATCGAGAAGATCC
TGACCTTCCGCATCCCCTACTACGTGGGCCCTTGGCCAGGGGAAAACAGCAGATTTCGCTGGATGACCAGAAAAGAGCGAGGAAACCATC
ACCCCTGGAATTCGAGGAAGTGGTGGACAAGGGCGCTTCCGCCAGAGCTTCATCGAGCGGATGACCAACTTCGATAAGAACCTGCC
CAACGAGAAGGTGCTGCCAAGCACAGCCTGCTGTACGAGTACTTCACCGTGTATAACGAGCTGACCAAAGTGAAATACGTGACCGAGG
GAATGAGAAAAGCCGCCTTCTGAGCGGCGAGCAGAAAAGGCCATCGTGGACCTGCTGTTCAAGACCAACCGGAAAAGTGACCGTGAAG
CAGCTGAAAAGAGGACTACTTCAAGAAAATCGAGTGTCTCGACTCCGTGGAATCTCCGCGTGGAAAGTCCGTTCAACGCCTCTCTGGG
CACATACCAGATCTGTGAAAATATCAAGGACAAGGACTTCTGGACAATGAGGAAAACGAGGACATTCGAAAGATATCTGTCTGA
CCCTGACACTGTTTGAGGACAGAGAGATGATCGAGGAACGGCTGAAAACCTATGCCACCTGTTTCGACGACAAAAGTGAAGCAGCTG
AAGCGGCGGAGATACACCGGCTGGGGCAGGCTGAGCCGGAAGCTGATCAACGGCATCCGGGACAAGCAGTCCGGCAAGACAATCCTGGA
TTTTCTGAAAGTCCGACGGCTTCGCCAACAGAAAATTCATGACGCTGATCCACGACGACAGCCTGACCTTTAAAGAGGACATCCAGAAA
CCCAGGTGTCCGGCCAGGGCGATAGCCTGCACGAGCACATTTGCCAATCTGGCCGGCAGCCCGCCATTAAGAAGGGCATCCTGCAGACA
GTGAAGGTGGTGGACGAGCTCGTGAAGTGTATGGCCGGCACAAGCCCGAGAACATCGTGTATCGAAATGGCCAGAGAGAACCAGACC
CCAGAAGGGACAGAAGAACAGCCGCGAGAGAATGAAGCGGATCGAAGAGGGCATCAAGAGCTGGGCGAGCCAGATCCTGAAAGAACACC
CCGTGGA AAAACACCCAGCTGCAGAACGAGAAGCTGTACCTGTACTACCTGCAGAATGGGCGGGATATGTACGTGGACCAGGAACCTGGAC
ATCAACCGGCTGTCCGACTACGATGTGGACCATATCGTGCCTCAGAGCTTTCTGAAGGACGACTCCATCGACAACAAGGTGCTGACCAG
AAGCGACAAGAACCGGGGCAAGAGCGACAACGTGCCCTCCGAAGAGGTGCTGAAGAAGATGAAGAACTACTGGCGGCAGCTGCTGAACG
CCAAGCTGATTACCCAGAGAAAAGTTTCGACAATCTGACCAAGGCCGAGAGAGGCGGCTGAGCGAACTGGATAAGGCCGGCTTCATCAAG
AGACAGCTGGTGGAAAACCCGGCAGATCACAAAGCACGTGGCACAGATCCTGGACTCCCGGATGAACACTAAGTACGACGAGAATGACAA
GCTGATCCGGGAAGTGAAGTGTATCACCTGAAGTCCAAGCTGGTGTCCGATTTCCGGAAGGATTTCCAGTTTACAAAAGTGCAGGAGA
```

TCAACA ACTACC ACCACG CCCCACGACGCCTACCTGAACGCCGTCGTGGGAACCGCCCTGATCAAAAAGTACCCTAAGCTGGAAAGCGAG  
TTCGTGTACGGCGACTACAAGGTGTACGACGTGCGGAAGATGATCGCCAAGAGCGAGCAGGAAATCGGCAAGGCTACCGCCAAGTACTT  
CTTCTACAGCAACATCATGAACTTTTTCAAGACCGAGATTACCCTGGCCAACGGCGAGATCCGGAAGCGGCCCTCTGATCGAGACAAACG  
GCGAAACCGGGGAGATCGTGTGGGATAAGGGCCGGGATTTTGCCACCGTGCAGAAAGTGCTGAGCATGCCCAAGTGAATATCGTGAAA  
AAGACCGAGGTGCAGACAGGCGGCTTCAGCAAAGAGTCTATCCTGCCCAAGAGGAACAGCGATAAGCTGATCGCCAGAAAAGGACTG  
GGACCCTAAGAAGTACGGCGGCTTCGACAGCCCCACCGTGGCCTATTCTGTGCTGGTGGTGGCCAAAAGTGGAAAAGGGCAAGTCCAAGA  
AACTGAAGAGTGTGAAAGAGCTGCTGGGGATCACCATCATGGAAAGAAGCAGCTTCGAGAAGAATCCCATCGACTTTCTGGAAGCCAAG  
GGCTACAAAAGAAGTGA AAAAGGACCTGATCATCAAGCTGCCTAAGTACTCCCTGTTCGAGCTGGAAAACGGCCGGAAGAGAATGCTGGC  
CTCTGCCGGCGAAGCTGCAGAAGGGAACGAACCTGGCCCTGCCCTCCA AATATGTGAACCTCCTGTACCTGGCCAGCCACTATGAGAAGC  
TGAAGGGCTCCCCGAGGATAATGAGCAGAAACAGCTGTTTGTGGAAACAGCACAAGCACTACCTGGACGAGATCATCGAGCAGATCAGC  
GAGTTCTCCAAGAGAGTGATCCTGGCCGACGCTAATCTGGACAAAAGTGCTGTCCGCCTACAACAAGCACC GGGATAAGCCCATCAGAGA  
GCAGGCCaAGAATATCATCCACCTGTTTACCCTGACCAATCTGGGAGCCCCTGCCGCCTTCAAGTACTTTGACACCACCATCGACCCGA  
AGAGGTACACCAGCACC AAAAGAGGTGCTGGACGCCACCCTGATCCACCAGAGCATCACC GGCCTGTACGAGACACGGATCGACCTGTCT  
CAGCTGGGAGGCGACAGCCCCAAGAAGAAGAGAAAAGGTGGAGGCCAGCTAATAGGACCCAGCTTTCTTGTACAAAAGTGGTGACGTAAGC  
TAGCAGGATCTTTGTGAAGGAACCTTACTTCTGTGGTGTGACATAATTGGACAAAACCTACCTACAGAGATTTAAAGCTCTAAGGTAAATA  
TAAAATTTTTAAGTGTATAATGTGTTAAACTACTGATTCTAATTGTTTGTGTATTTTAGATTCCAACCTATGGAAGTATGAATGGGAG  
CAGTGGTGAATGCCTTTAATGAGGAAAACCTGTTTTGCTCAGAAGAAATGCCATCTAGTGATGATGAGGCTACTGCTGACTCTCAACA  
TTCTACTCCTCCAAAAAAGAAGAGAAAAGGTAGttGACCCCAAGGACTTTTCTT CAGAATTGCTAAGTTTTTTGAGTCATGCTGTGTTTA  
GTAATAGA ACTCTTGCTTGCTTTGCTATTTACACCACAAAAGGAAAAAGCTGCACTGCTATAACAAGAAAATTTATGGAAAAATATTCTGTA  
ACCTTTATAAGTAGGCATAACAGTTATAATCATAACATACTGTTTTTTTCTTACTCCACACAGGCATAGAGTGTCTGCTATTAATAACTA  
TGCTCAAAAATTTGTGTACCTTTTAGCTTTTTAATTTGTAAAGGGGTTAATAAGGAATATTTGATGTATAGTGCCCTTGACTAGAGATCATA  
ATCAGCCATAACCACATTTGTAGAGGTTTTACTTGCTTTAAAAAACCTCCCACACCTCCCCCTGAACCTGAAACATAAAAATGAATGCAAT  
TGTTGTTGTTAACTTGTTTATTGCAGCTTATAATGGTTACAAAATAAAGCAATAGCATCACAAAATTTACAAAATAAAGCATTTTTTTTTAC  
TGCAATCTAGTTGTGGTTTTGTCCAAACTCATCAATGTATCTTATCATGTCTGGATCCCGTTTTAAACTACGCGTAATTCAAACAGGGTTC  
TGGCGTCGTTCTCGTACTGTTTTTCCCAGGCCAGTGCTTTAGCGTTATTGAAAAAGGAAGAGTATGAGTATTCAACATTTCCGTGTGCG  
CCTTATTCCCTTTTTTGC GGCATTTTGCCTTCTGTTTTTGTCTACCCAGAAAACGCTGGTGAAGTAAAAGATGCTGAAGATCAGTTGG  
GTGCACGAGTGGGTTACATCGA ACTGGATCTCAACAGCGGTAAGATCCTTGAGAGTTTTTCGCCCCGAAGAACGTTTTTCCAATGATGAGC  
ACTTTTTAAAGTTCTGCTATGTGGCGCGGTATTATCCCGTATTGACGCCGGGAAGAGCAACTCGGTCGCCGCATACACTATTCTCAGAA  
TGACTTGGTTGAGTACTCACCAGTCACAGAAAAGCATCTTACGGATGGCATGACAGTAAGAGAATTATGCAGTGCTGCCATAACCATGA  
GTGATAACACTGCGGCCAACTTACTTCTGACAACGATCGGAGGACCGAAGGAGCTAACCGCTTTTTTTGCACAACATGGGGGATCATGTA  
ACTCGCCTTGATCGTTGGGAACCGGAGCTGAATGAAGCCATACCAAACGACGAGCGTGACACCACGATGCCTGTAGCAATGGCAACAAC  
GTTGCGCAA ACTATTA ACTGGCGAACTACTTACTCTAGCTTTCCCGGCAACAATTAATAGACTGGATGGAGGCGGATAAAAGTTGCAGGAC  
CACTTCTGCGCTCGGCCCTTCCGGCTGGCTGGTTTTATTGCTGATAAATCTGGAGCCGGTGAGCGTGGGTCTCGCGGTATCATTGCAGCA  
CTGGGGCCAGATGGTAAGCCCTCCCGTATCGTAGTTATCTACACGACGGGGAGTCAGGCAACTATGGATGAACGAAAATAGACAGATCGC  
TGAGATAGGTGCCTCACTGATTAGCATTGGTA ACTGTGACAGCAAGTTTACTCATATATACTTTAGATTGATTTAAA ACTTCAATTTTT  
AATTTAAAAGGATCTAGGTGAAGATCCTTTTTTGATAATCTCATGACCAAAAATCCCTTAACGTGAGTTTTCGTTCCACTGAGCGTCAGAC  
CCCGTAGAAAAGATCAAAGGATCTTCTTGAGATCCTTTTTTTTCTGCGGTAATCTGCTGCTTGCAAAAACAAAAAAACCACCGCTACCAGC  
GGTGGTTTTGTTTGC CGGATCAAGAGCTACCAACTCTTTTTTCCGAAGGTA ACTGGCTTCAGCAGAGCGCAGATAACCAATACTGTTCTTC  
TAGTGTAGCCGTAGTTAGGCCACC ACTTCAAGA ACTCTGTAGCACCGCCTACATACTCGCTCTGCTAATCCTGTTACCAGTGGCTGCT  
GCCAGTGGCGATAAGTCTGTCTTACC GGGTTGGACTCAAGACGATAGTTACC GGATAAGGCGCAGCGGTCCGGCTGAACGGGGGGTTC  
GTGCACACAGCCAGCTTGGAGCGAACGACCTACACCGA ACTGAGATACCTACAGCGTGAGCTATGAGAAAAGCGCCACGCTTCCCGAAG  
GGAGAAAAGGCGGACAGGTATCCGGTAAGCGGCAGGGTCGGAACAGGAGAGCGCACGAGGGAGCTTCCAGGGGGGAAACGCCTGGTATCTT  
TATAGTCTGTGGGTTTTCGCCACCTCTGACTTGAGCGTCGATTTTTTGTGATGCTCGTCAGGGGGGGCGGAGCCTATGGAAAAACGCCAG  
CAACGCGGCCTTTTTTACGGTTTCTGGCCTTTTTGCTGGCCTTTTTGCTCACATGTTCTTTCTGCGTTATCCCTGATTCTGTGGATAACC  
GTATTACCGCCTTTGAGTGAGCTGATAACCGCTCGCCGACGCCGAACGACCGAGCGCAGCGAGTCAGTGAGCGAGGAGAAGA

# pKRG3-mU6-Pub-hSpCas9

aae U6

*Bbs*I sites for sgRNA cloning

sgRNA tracrRNA and U6 terminator

aae Pub promoter

NLS

hSpCas9

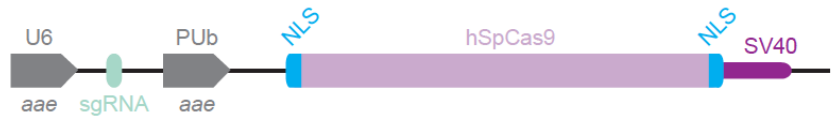

```
GCGCCAATACGCAAACCGCCTCTCCCCGCGGGTTGGCCGATTCATTAATGCAGGCAACTCGTGAAAGGTAGGCGGATCAGCGAATGAA
ATCGCCCATCGAGTTGATACGTCCATCCATCGCTAGAACC CGCTTCGCTGTAGAAGACTATATAAGAGCAGAGGCAAGAGTAGTGAAAT
gGAGACgAGTCTCTtGTTTTAGAGCTAGAAATAGCAAGTTAAAAA TAAGGC TAGTCCGTTTATCAACTTGAAAAAGTGGCACCAGTCCGGT
GCTTTTTTTTGTTTTAGAGCTAGAAATAGCAAGTTAAAAA TAAGGC TAGTCCGTTTTTAGCGCTTTCGCGCAATTCCTGCAGACAAATGGC
TATCTTTACATGTAGCTTGTGCATTTGAATCCAATTAATAATTTGCCTTGGCACCAGCTGAGCCAGACAAAGAAAAGAAAGCTTCCCAAAGTATA
TCGATTTTAGAAGGGTTGACGTACCTTGCCTGACTGCATTAATACAGCAAAATGATGCAATTAGAATGATTTCAAGTGAAATTTCCCAAATTAC
TGATTTTTCTCTGGATTTGGTTATCAGATTACATTCGAAGCTAAGATTAGCTACCGAAAATTTGTCGATCAAATCAGGAAATCCTTTTCTCT
ATCGAAAAAGGCATTCGCACATCTTCTCTCTATGCCATATACACGAAGGGTAGGTACATTTGACGTCTTTTGCCAGAAGTTGAACTGCAT
CGTTCAAGGTACAGAATGAACGACTAACAGACACAAGCACGTTTTGCTGTCCATTCAGACACAGGGATGGTACCCATATTCGATCGATA
TAGAGCCATCCAACCGAACAGAGGTATATGTATGAATGTATTCGTAAGTACAACCACCACACGACAGTGTCTATAA
AACGCCCCTGCAAAGGCGAAACCAGCTCAATCGAATACGTTTTCCTAGTGGAGTGAACATACGCGGCCCAAGTAAGCAGTGCAGTGC
AGTGAAGTGAAGTCTCTAGTGA AAAAGAGT GATCCAATTAGCCAGAGGAGAAAAATTTAGAGTGAACAAAGCTTTATTTCAAAGGACAAT
TACTATTA AATTTGGTGAAGTGCATTTTCGGTGAAGGGAATCTTCTAGTGAAGGTAGGTAAAATTAATTTGATGAAATTTATAGCTATGAGCG
AAAAC TAGTTTTGGTGAATGATTTCTTTGTCTTTTGAATGAGCAAACTATTTTTTCCAAGATGGCGACTATTGAGCTTTTGAGTGATTTAGTGAA
AATTTGCAACGCAGTTTTCATCATCATTTGATAAAAACCCAATTTGTGATTCACAGCGATAAATCATAATTTGCTTGAATCATCGCTACTAATTTG
AATTTAAATTTCTAGAATAAATAAGAATAACGTTATTTGCTCCGTCACATATCTAAAATAAATATTTTGATGGTTAATTTACCCATTAAGGTA
ATATTAACACATATCGAGAAAAACCTTGAGGAAAATCGTGA AAAACTTGAAGATACGCAATTTCAAACACACGTTCAAAGTTCGAAAAAC
AAGTTAATTTTTCACATTA AAAAGTAGGGCGTTGTTGTGACGCTCATCACCCTCAAGTGTATATTTTTCACTTGGCCGTCGCAGTCAAACGC
AGACAAAAGCAAAAACAAGTTTAAAACCTGTCTGTCTGCTCGAAGCCAAAAGGCAATGAATCAATATCAAATGAGAGTTTGCATTTTCACA
ACCAATTA CTCAAGCGTTTTCTCGTTTTCTTTCTGCTCAACAGAGATTTTCAACA CCAAGCTCGATAAGCTTTGTTTCAAGTCTCGAGTGC
GCGCTTCCGGAGGTATACACCTAGGCGGTACCAC TGCAGTGAATTCGGAGCTCTACCGGTGCCACC ATGGCCCCAAAGAAGAAGCGGAA
GGTCCGTTATCCACGGAGTCCCAGCAGCCGACAAGAAGTACAGCATCGGCC TGGACATCGGCACCAACTCTGTGGGC TGGGCCGTGATCA
CCGACGAGTACAAGGTGCCAGCAAGAAATTC AAGGTGCTGGGCAACACCGACCGGCACAGCATCAAGAAGAACC TGATCGGAGCCCTG
CTGTTTCGACAGCGGCGAAACAGCCGAGGCCACCCGGCTGAAGAGAACC GCCAGAAGAAGATACACCAGACGGAAGAACC GGATCTGCTA
TCTGCAAGAGATCTTCAGCAACGAGATGGCCAAGGTGGACGACAGCTTCTTCCACAGACTGGAAGAGTCCCTCC TGGTGGAAAGAGGATA
AGAAGCAGAGCGGCACCCCATCTTCGGCAACATCGTGGACGAGGTGGCC TACCACGAGAAGTACCCACCATCTACCACCTGAGAAAG
AACTGGTGGACAGCACCGACAAGGCCGACC TGCGGCTGATCTATCTGGCCC TGGCCACATGATCAAGTTCGGGGGCCACTTCTTGAT
CGAGGGCGACC TGAACCCCGACAACAGCGACGTGGACAAGCTGTTTCATCCAGCTGGTGCAGACC TACAACCAGCTGTTTCGAGGAAAACC
CCATCAACGCCAGCGCGTGGACGCCAAGGCCATCTGCTGTCGCCAGACTGAGCAAGAGCAGACGGCTGGAAAATCTGATCGCCAGCTG
CCCGCGGAGAAGAAGAAATGGCC TGTTCGGAAAACCTGATTTGCCCTGAGCC TGGCCCTGACCCCAACTCAAGAGCAACTTCGACC TGGC
CGAGGATGCCAAAAC TGCAGCTGAGCAAGGACACTACGACGACGACTGGACAACCTGCTGGCCAGATCGGCCAGCAGTACGCCGACC
TGTTTTCTGGCCGCCAAGAACC TGTCCGACGCCATCTGCTGAGGACATCTCTGAGAGTGAACACCGAGATCA CCAAGGCCCCCTGAGC
GCCCTATGATCAAGAGATACGACGAGCACCACCAGGACC TGAACCTGCTGAAAGCTCTCGTGCGGCAGCAGCTGCC TGAAGTACAA
AGAGATTTTCTTCGACCAGAGCAAGAACGGCTACGCCGGCTACATTTGACGGCGGAGCCAGCCAGGAAGAGTTCTACAAGTTTCATCAAGC
CCATCTGGAAAAGATGGACGGCACCGAGGAAC TGTCTGTGAAGCTGAACAGAGAGGACC TGTGCGGAAGCAGCGGACC TTCGACAAC
GGCAGCATCCCCACCAGATCCACC TGGGAGAGCTGCACGCCATCTGCGGCGGCAGGAAGATTTTTTACCCATCTCTGAAGGACAACCG
GGAAAAGATCGAGAAGATCTGACC TTTCCGCATCCCC TACTACGTGGGCCCTCTGGCCAGGGGAAAACAGCAGATTCGCC TGGATGACCA
GAAAGAGCGAGGAAACCATCACCCCTGGAACTTCGAGGAAGTGGTGGACAAGGGCGCTTCCGCCAGAGCTTCATCGAGCGGATGACC
AACTTCGATAAGAACC TGCCTAACGAGAAGGTGCTGCCAAAGCACAGCTGCTGTACGAGTACTTCACCGTGTATAACGAGCTGACCAA
AGTGAAATACGTGACC GAGGGAATGAGAAAAGCCCGCTTCTTGAGCGGCGAGCAGAAAAGGCCATCGTGGACC TGTGTTCAAGACCA
ACCGGAAAGTGACCGTGAAGCAGCTGAAAGAGGACTACTTCAAGAAAATCGAGTGTCTCGACTCCGTGGAAAATCTCCGGCGTGGAAAGAT
CGGTTCAACGCC TCCC TGGGCACATACCACGATCTGCTGAAAATTAATCAAGGACAAGGACTTCTTGGCAATGAGGAAAACGAGGACAT
TCTGGAAGATATCGTGTCTGACCTGACACTGTTTTGAGGACAGAGAGATGATCAGGAAACCGCTGAAAACCTATGCCCAACTGTTTCGACG
ACAAAGTGATGAAGCAGCTGAAGCGGCGGAGATACACCCGCTGGGGCAGGCTGAGCCGGAAGCTGATCAACGGCATCCGGGACAAGCAG
TCCGGCAAGACAATCC TGGATTTCTTGAAGTCCGACGGCTTCGCCAACAGAAAAC TTCATGCAGCTGATCCACGACGACAGCTGACC TTT
TAAAGAGGACATCCAGAAAAGCCAGGTGTTCCGGCCAGGGCGATAGCTGCACGAGCACATTTGCCAATCTGGCCGGCAGCCCCGCCATTA
AGAAGGGCATCTGCAGACAGTGAAGGTGGTGGACGAGCTCGTGAAGTGTGAGGGCCGCAAGCCGAGAACATCGTGTATCGAAATG
GCCAGAGAGAACCAGACCACCCAGAAGGGACAGAAGAACAGCCGCGAGAGAATGAAGCGGATCGAAGAGGGCATCAAAGAGCTGGGCAG
CCAGATCTTGAAGAACACCCCGTGGAAAACACCCAGCTGCAGAACGAGAAGCTGTACC TGTACTACC TGCAGAATGGGCGGGATATGT
ACGTGGACCAGGAAC TGGACATCAACCGGCTGTCCGACTACGATGTGGACCATATCGTGCCTCAGAGCTTTCTGAAGGACGACTCCATC
GACAACAAGGTGCTGACCAGAAGCGACAAGAACC GGGGCAAGAGCGACAACGTGCC TCCGAAGAGGTCTGAAGAAGATGAAGAACTA
CTGGCGGCAGCTGCTGAACGCCAAGCTGATTTACCCAGAGAAAAGTTTCGACAATCTGACCAAGGCCGAGAGAGGGCGGCTGAGCGAAC TGG
ATAAGGCCGGCTTTCATCAAGAGACAGCTGGTGGAAAACCCGGCAGATCACAAGCACGTTGGCACAGATCTTGGACTCCCGGATGAACACT
AAGTACGACGAGAATGACAAGCTGATCCGGGAAGTGAAGTGTACCCCTGAAGTCCAAGCTGGTGTCCGATTTCCGGAAGGATTTCCA
GTTTTTACAAAAGTGC GCGAGATCAACAAC TACCACCACGCCACGACGCC TACC TGAACGCCGTCGTGGGAACCGCCCTGATCAAAAAGT
ACCTAAGCTGGAAGCGAGTTCTGTACGGCGACTACAAGGTGTACGACGTGCGGAAGATGATCGCCAAGAGCGAGGAAATCGGC
```



AAGGCTACCGCCAAGTACTTCTTCTACAGCAACATCATGAACTTTTTCAAGACCGAGATTACCCGGCCAAACGGCGAGATCCGGAAGCG  
GCCCTCGATCGAGACAAACGGCGAAACCGGGGAGATCGTGTGGGATAAGGGCCGGGATTTTGGCCACCGTGGCGAAAGTGC TGAGCATGC  
CCCAAGTGAATATCGTGAAAAAGACCGAGGTGCAGACAGGCGGCTTCAGCAAAGAGTCTATCCTGCCAAAGAGGAACAGCGATAAGCTG  
ATCGCCAGAAAAGGACTGGGACCCTAAGAAGTACGGCGGCTTCGACAGCCCCACCGTGGCCATATCTGTGCTGGTGGTGGCCAAAGT  
GGAAAAGGGCAAGTCCAAGAACTGAAGAGTGTGAAAGAGCTGCTGGGGATCACCATCATGGAAAAGCAGCTTCGAGAAGAAATCCCA  
TCGACTTCTGGAAGCCAAGGGCTACAAAGAAGTAAAAAGGACCTGATCATCAAGCTGCCTAAGTACTCCCTGTTCGAGCTGGAAAAC  
GGCCGGAAGAGAATGCTGGCCCTCGCCGGCGAACGTCAGAAGGGAAACGAACGGCCCTGCCCTCCAAATATGTGAACCTCCCTGTACCT  
GGCCAGCCACTATGAGAAGCTGAAGGGCTCCCCGAGGATAATGAGCAGAAAACAGCTGTCTGTGGAACAGCACAAGCACCTACCCTGGACG  
AGATCATCGAGCAGATCAGCGAGTCTCCAAGAGAGTGATCTCGCCGACGCTAAATCTGGACAAAAGTGCCTGTCCGCCCTACAACAAGCAC  
CGGGATAAGCCCATCAGAGAGCAGGCCaAGAAATATCATCCACCCTGTTTACCCAGCAAACTGGGAGGCCCTGCCGCCCTCAAGTACTT  
TGACACCACCATCGACCAGGAGGTACACCAGCACCAAGAGGTGCTGGACGCCACCCTGATCCACCAGAGCATCACCGGCCCTGTACG  
AGACACGGATCGACCCTGTCTCAGCTGGGAGGGCGACAGCCCAAGAAGAAGAGAAAGGTGGAGGGCCAGCTAATAGGACCCAGCTTTCTTG  
TACAAAGTGGTGACGTAAGCTAGCAGGATCTTTGTGAAGGAACCTTACTTCTGTGGTGTGACATAAATGGACAAAACCTACCTACAGAGAT  
TTAAAGCTCTAAGGTAATAATAAAATTTTTAAGTGTATAATGTGTTAAACTACTGATTCATATGTTTTGTGTATTTTTAGATTTCCAACCT  
ATGGAACGTGATGAATGGGAGCAGTGGTGGAAATGCCTTTAAATGAGGAAAACCTGTTTTGCTCAGAAGAAATGCCATCTAGTGATGATGAG  
GCTACTGCTGACTCTCAACATTTACTCTCCAAAAAAGAAGAGAAAGGTAGtGACCCCAAGGACTTTCCCTCAGAAATGCTAAGTTTT  
TTTTGAGTCATGCTGTGTTTTAGTAATAGAACCTTTGCTTTGCTTTTGCATTTTACACCACAAAGGAAAAAGCTGCACCTGCTATACAAGAAAA  
TTATGGAAAAATATCTGTAACCTTTTATAAGTAGGCATAACAGTTATAATCATAACATACTGTTTTTTTTCTTACTCCACACAGGCATAGA  
GTGCTGCTATTAATAACTATGCTCAAAAATTTGTGTACCTTTTAGCTTTTTTAATTTGTAAGGGGTTAATAAGGAATATTTGATGTATAG  
TGCCTTGACTAGAGATCATAATCAGCCATACCACATTTGTAGAGGTTTTACTTTGCTTTAAAAAACCTCCACACCTCCCCCTGAACCTG  
AAACATAAAATGAATGCAATGTGTGTTAACTGTGTTATGTCAGCTTATAATGGTTACAAAATAAAGCAATAGCATCACAAAATTTAC  
AAATAAGCATTTTTTTTCACTGCATCTAGTTGTGGTTTTGTCCAAACATCAATGTATCTTATCATGTCTGGATCCCGTTTTAAACTAC  
CGGTAATTCAAACAGGGTTCTGGCGTCGTTCTCGTACTGTTTTTCCCGAGCCAGTGCCTTTAGCGTTATTGAAAAAGGAAGAGTATGAGT  
ATTC AACATTTCCGTGTCGCCCTTATTTCCCTTTTTTTGCGGCATTTTGGCTTCCCTGTTTTTTGCTCACCCAGAAAACGCTGGTGAAGTAAA  
AGATGCTGAAGATCAGTTGGGTGCACGAGTGGGTTACATCGAACGGATCTCAACAGCGGTAAGATCCCTTGAGAGTTTTTCGCCCCGAAG  
AACGTTTTTCCAATGATGAGCACTTTTTAAAGTTCGCTATGTGGCGCGGTATTTATCCCGTATGACGCCGGGCAAGAGCAACTCGGTCCG  
CGCATAACATATCTCAGAATGACTTGGTTGAGTACTCACAGTACACAGAAAAGCATCTTACGGATGGCATGACAGTAAGAGAAATATG  
CAGTGC TGCCATAACCATGAGTGATAACACTGCGGCCAACCTTACTTCTGACAACGATCGGAGGACCGAAGGAGCTAACCGCTTTTTTTG  
ACAACATGGGGGATCATGTAACCTGCCCTTGATCGTTGGGAACCGGAGCTGAATGAAGCCATACCAAACGACGAGCGTGACACCACGATG  
CCTGTAGCAATGGCAACAACGTTGCGCAAACTATTTAACTGGCGAACCTACTTACTCTAGCTTCCCGGCAACAATTAATAGACTGGATGGA  
GGCGGATAAAGTTGCAGGACCCTTCTGCGCTCGGCCCTTCCGGCTGGCTGGTTTTATTTGCTGATAAAATCTGGAGCCGGTGAGCGTGGGT  
CTCGCGGTATCATTTGCAGCACGCGGGCCAGATGGTAAGCCCCTCCCGTATCGTAGTTATCTACACGACGGGGAGTCAGGCAACTATGGAT  
GAACGAAATAGACAGATCGCTGAGATAGGTGCCCTCACCTGATTAAGCATTTGGTAACGTGTCAGACCAAGTTTTACTCATATATACTTTTAGAT  
TGATTTAAAACCTCATTTTTTAATTTAAAAGGATCTAGGTGAAGATCCTTTTTGATAAATCTCATGACCAAAAATCCCCTAACGTGAGTTTT  
CGTTCCACTGAGCGTCAGACCCCGTAGAAAAGATCAAAGGATCTTCTTTGAGATCCTTTTTTTTCTGCGCGTAATCTGCTGCTTGCAAACA  
AAAAAACCCCGCTACCAGCGGTGGTTTTGTTTTGCCGGATCAAGAGCTACCAACTCTTTTTTCCGAAGGTAACGGCTTTCAGCAGAGCGCA  
GATACCAAATACGTCTTCTTAGTGTAGCCGTAGTTAGGCCACCCTTCAAGAACTCTGTAGCACCAGCTACATACCTCGCTCTGCTAA  
TCCGTATTACCAGTGGCTGCTGCCAGTGGCGATAAGTCTGTCTTTACCAGGCTGGACTCAAGACGATAGTTACCAGGATAAGGCGCAGCGG  
TCGGGCTGAACGGGGGTTTCGTGCACACAGCCAGCTTGGAGCGAACGACCTACACCGAAC TGAGATACCCTACAGCGTGAGCTATGAGA  
AAGCGCCACGCTTCCCGAAGGGAGAAAGGCGGACAGGTATCCGGTAAGCGGCAGGGTCGGAACAGGAGAGCGCACGAGGGAGCTTCCAG  
GGGAAACGCCCTGGTATCTTTATAGTCCGTGTCGGGTTTTCGCCACCCTGACTTGAGCGTCGATTTTTTGTGATGCTCGT CAGGGGGCGG  
AGCCTATGGA AAAACGCCAGCAACGCGGCCTTTTTACGGTTCCCTGGCCTTTTTGTGCTGACATGTTCTTTCCCTGCGTTACC  
CCTGATTCGTGGATAACCGTATTTACCGCCTTTTGAGTGAGCTGATACCCTCGCCGACCGCAACGACCGAGCGCAGCGAGT CAGTGAG  
CGAGGAGAAGA

pKRG3-mU6-Pub-hSpCas9-pAc

aae U6

BbsI sites for sgRNA cloning

sgRNA tracrRNA and U6 terminator

aae Pub promoter

NLS

hSpCas9

T2A

pAc

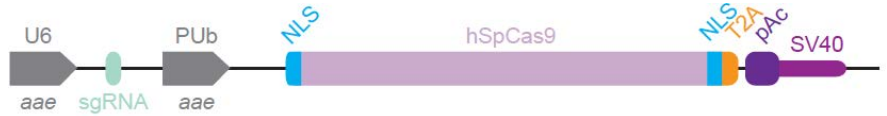

GCGCCCAATACGCAAACCGCCTCTCCCCGCGGGTTGGCCGATTCATTAATGCAGGCAACTCGTGAAAAGGTAGGCGGATCAGCGAATGAA  
 ATCGCCCATCGAGTTGATACGTCCATCCATCGCTAGAACCGCGTTTCGCTGTAGAAGACTATATAAGAGCAGAGGCAAGAGTAGTGAAAT  
 gGAGACGaCGTCTCtGTTTTAGAGCTAGAAATAGCAAGTTAAAATAAAGGCTAGTCCGTTATCAACTTGAAAAAGTGGCACCGAGTCGGT  
 GCTTTTTTGTTTTAGAGCTAGAAATAGCAAGTTAAAATAAAGGCTAGTCCGTTTTTTAGCGCTTGCGCCAATTCTGCAGACAAATGGCTAT  
 CTTTACATGTAGCTTGTGCATTGAATCCAATTATAATTTGCCTTGGCACCAGCTGAGCCAGACAAGAAAAGAAAGCTTCCCAGAAGTATA  
 TCGATTTAGAAGGGTTGACGTCACTTGTCTGACTGCACATAACAGCAAATGATGCAATTAGAATGATTCAAGTGAAATTTCCAAATTAC  
 TGATTTTTCTCTGGATTTGGTTATCAGATTACATTCGAAGCTAAGATTAGCTACCGAAAATTGTCGATCAAATCAGGAAATCCTTTCTCT  
 ATCGAAAAAGGCATTTCGCACATCTTCTCTCTATGCCATATACACGAAGGGTAGGTACATTGACGTCTTTGCCAGAAGTTGAACTGCAT  
 CGTTCAAGGTACAGAATGAACGACTAACAGACACAAGCAGTTTTGCTGTCCATTTCAGACACAGGGATGGTACCCATATTCGATCGATA  
 TAGAGCCATCCAACCGAACAGAGGTATATGTATGAATGTATTGCTGAAATTTTCTAGAAGTACAACCACCTACGACAGTGTCTATAA  
 AACGCCCCGCAAAGGCGAAACCAGCTCAATCGAATACGTTTTCTAGTGGAGTGAACATTACGCGGCCCAAGTAAGCAGTGCCAGTGCA  
 AGTGAAGTGAAGTCTCTAGTGA AAAAGAGTGTCCAATTAGCCAGAGGAGAAAATTTTCAGAGTGAACAAAGCTTTATTCAAAGGACAAT  
 TACTATTA AATTGGTGAAAAGTGCATTTCCGTTGAAGGGAATCTTCTAGTGAAGGTAGGTA AATTAATTGATGAAATATAGCTATGAGCG  
 AAAACTAGTTTTGGTGAATGATTCCTTTGTCTTTGAATGAGCAAACTATTTTCCAAGATGGCGACTATTGAGCTTTGAGTGATTAGTGAA  
 AATTTGCAACGCAGTTTCATCATCATTGATAAAACCCAATTTGTGATTCACAGCGATAATCATATTTTCGTTGAATCATCGCTACTAATTTG  
 AATTA AATTTCTAGAATAATAAGAATAACGTAATTTGCTCCGTACATATCTAAAATAAATATTTTGTATGGTTAATTAACCAATTAAGGTA  
 ATATTAACACATATCGAGAAAACCTTGAGGAAATCGTGA AAAACTTGAAGATAACGCAATTTCAAACACTAGCTAGTTCAAAGTCGAAAAC  
 AAGTTAATTTTTCACTTAAAAGTAGGGCGTTGTTGTGACGTATCACCTCAAGTGTATATTTTTCACTTGGCCTGCGACTGCAAAACGC  
 AGACAAAGCAAAAACAAGTTTAAAACCTGTCTGTCTGCTCGAAGCCAAAGGCAATGAATCAATATCAAATGAGAGTTTGCATTTCAACA  
 ACCAATTA CTCAAGCGTTTCTCTGTTTTTCTGCTCAACAGAGATTTCAACA CCAAGCTCGATAAGCTTGTTCGAATCTCGAGTGC  
 GCGCTTCCGGAGGTATACACCTAGGCGGTACCCTGCAGTGAATTCGGAGCTCTACCGGTGCCACCATGGCCCCAAGAAGAAGCGGAA  
 GGTTCGGTATCCACGGAGTCCCAGCAGCCGACAAGAAGTACAGCATCGGCCTGGACATCGGCACCAACTCTGTGGGCTGGGCCGTGATCA  
 CCGACGAGTACAAGGTGCCAGCAAGAAATTC AAGGTGCTGGGCAACACCGACCGGCACAGCATCAAGAAGAACCTGATCGGAGCCCTG  
 CTGTTTCGACAGCGGCGAAACAGCCGAGGCCACCCGGCTGAAGAGAACC GCCAGAAGAAGATACACCAGACGGAAGAACCGGATCTGCTA  
 TCTGCAAGAGATCTTCAGCAACGAGATGGCCAAGGTGGACGACAGCTTCTTCACAGACTGGAAGAGTCTTCTGTTGGAAGAGGATA  
 AGAAGCACGAGCGGCACCCCATCTTCGGCAACATCGTGGACGAGGTGGCCTACCACGAGAAGTACCCACCATCTACCACCTGAGAAAAG  
 AAATGGTGGACAGCACCGACAAGGCCGACCTGCGGCTGATCTATCTGGCCCTGGCCACATGATCAAGTTCCGGGGCCACTTCCTGAT  
 CGAGGGCGACTGAACCCCGACAACAGCGCAGCTGGACAAGCTGTTTCATCCAGTGGTGCAGACCTACAACCAGCTGTTTCGAGGAAAAC  
 CCATCAACGCCAGCGGCTGGACGCCAAGGCCATCTGTCTGCCAGACTGAGCAAGACAGACAGCTGGAAAATCTGATCGCCAGCTG  
 CCCGGCGAGAAGAAGATGGCCTGTTTCGGAACCTGATGTCCTGAGCCTGGGCTGACCCCAACTCAAGAGCAACTCGACCTGGC  
 CGAGGATGCCAACTGCAGCTGAGCAAGGACACCTACGACGACGACCTGGACAACCTGCTGGCCAGATCGGCGACCAGTACGCCGACC  
 TGTTTTCTGGCCGCAAGAACCTGTCCGACGCCATCTGCTGAGCGACATCCTGAGAGTGAACACCGAGATCACCAAGGCCCCCTGAGC  
 GCCTCTATGATCAAGAGATACGACGAGCACCACCAGGACCTGACCCTGCTGAAAAGCTCTCGTGGCGCAGCAGCTGCCTGAGAAGTACAA  
 AGAGATTTTCTTCGACCAGAGCAAGAACGGCTACGCCGGCTACATTGACGGCGGAGCCAGCCAGGAAGAGTTCTACAAGTTTCATCAAGC  
 CCATCTTGAAAAGATGGACGGCACCGAGGAACCTGCTCGTGAAGCTGAACAGAGAGGACCTGCTGCGGAAGCAGCGGACCTTCGACAAC  
 GGCAGCATCCCCACCAGATCCACCTGGGAGAGCTGCACGCCATTCTGCGGCGGCAGGAAGATTTTTTACCATTCTGAAGGACAACCG  
 GGAAAAGATCGAGAAGATCTGACCTTCCGCATCCCCTACTACGTGGGCCCTTGGCCAGGGGAAAACAGCAGATTTCGCTGGATGACCA  
 GAAAGAGCGAGGAAACCATCACCCCTGGAACCTCGAGGAAGTGGTGGACAAGGGCGCTTCCGCCAGAGCTTCATCGAGCGGATGACC  
 AACTTCGATAAGAACCTGCCCAACGAGAAGGTGCTGCCAAGCACAGCCTGCTGTACGAGTACTTCACCGTGTATAACGAGCTGACCAA  
 AGTGA AATACGTGACCGAGGGAATGAGAAAAGCCCGCCTTCCTGAGCGGCGAGCAGAAAAGGCCATCGTGGACCTGCTGTTCAAGACCA  
 ACCGAAAAGTGAACCTGAAGCAGCTGAAAAGAGGACTACTTCAAGAAAATTCAGTGTCTGACTCCGTGGAAAATTCGCGGCTGGAAGAT  
 CGGTTCAACGCCTCCCTGGGCACATACCAGACTCTGTGAAAATATCAAGGACAAGGACTTCTGGACAATGAGGAAAACAGGAGCAT  
 TCTGGAAGATCTCGTGTGACCTGACCTGACCTGTTTGGAGCAGAGAGATGATCGAGGAACCGCTGAAAACCTATGCCCACTGTTCGACG  
 ACA AAGTGAAGCAGCTGAAGCGGCGGAGATACACCGGCTGGGGCAGGCTGAGCCGGAAGCTGATCAACGGCATCCGGGACAAGCAG  
 TCCGGCAAGACAATCTGGATTTCTGAAAGTCCGACGGCTTCGCCAACAGAAAATTCATGCAGCTGATCCACGACGACAGCCTGACCTT  
 TAAAGAGGACATCCAGAAAAGCCAGGTGTCCGGCCAGGGCGATAGCCTGCACGAGCACATTGCCAATCTGGCCGGCAGCCCCGCCATTA  
 AGAAGGGCATCTGCAGACAGTGAAGGTGGTGGACGAGCTCGTGA AAGTGAAGTGGCCGGCACAAGCCCAGAACATCGTGAATG  
 GCCAGAGAGAACCAGACCACCCAGAAGGGACAGAAGAACAGCCGCGAGAGAATGAAGCGGATCGAAGAGGGCATCAAAGAGCTGGGCAG  
 CCAGATCTGAAAAGAACACCCCGTGGAAAACACCCAGCTGCAGAACGAGAAGCTGTACCTGTACTACCTGCAGAATGGGCGGGATATGT  
 ACGTGGACCAGGAACCTGGACATCAACCGGCTGTCCGACTACGATGTGGACCATATCGTGCCTCAGAGCTTTCTGAAGGACGACTCCATC  
 GACAACAAGGTGCTGACCAGAAGCGACAAGAACC GGGGCAAGAGCGACAACGTGCCCTCCGAAGAGGTCTGGAAGAAGATGAAGAACTA  
 CTGGCGGACGCTGCTGAACGCCAAGCTGATTACCCAGAGAAAAGTTTCGACAATCTGACCAAGGCCGAGAGAGGGCGGCTGAGCGAACTGG  
 ATAAGGCCGGCTTCATCAAGAGACAGCTGGTGGAAAACCCGGCAGATCAAAAAGCACGTGGCACAGATCCTGGACTCCCGGATGAACACT  
 AAGTACGACGAGAATGACAAGCTGATCCGGGAAGTGA AAGTGAATCACCTGAAGTCCAAGCTGGTGTCCGATTTCCGGAAGGATTTCCA

GT TTTTACAAAGT GCGGAGATCAACA ACTACCACCACGCCACGACGCCTACCTGAACGCCGTGCTGGGAACCGCCTGATCAAAAAGT  
ACCCTAAGCTGGAAAGCGAGTTCGTGTACGGCGACTACAAGGTGTACGACGTGCGGAAGATGATCGCCAAGAGCGAGCAGGAAATCGGC  
AAGGCTACCGCAAGTACTTCTTCTACAGCAACATCATGAACTTTTTCAAGACCGGAGATTACCCTGGCCAACGGCGAGATCCGGAAGCG  
GCCTCTGATCGAGACAAACGGCGAAACCGGGGAGATCGTGTGGGATAAGGGCCGGGATTTTGCCACCGTGCAGAAAGTGTGAGCATGC  
CCCAAGTGAATATCGTGAAAAAGACCGAGGTGCAGACAGGCGGCTTCAGCAAAGAGTCTATCCTGCCCAAGAGGAACAGCGATAAGCTG  
ATCGCCAGAAAAGAGGACTGGGACCCTAAGAAGTACGGCGGCTTCGACAGCCCCACCGTGGCCTATTCTGTGCTGGTGGTGGCCAAAAGT  
GGAAAAGGGCAAGTCCAAGAACTGAAGAGTGTGAAAGAGCTGCTGGGGATCACCATCATGGAAAAGAGCAGCTTCGAGAAGAATCCCA  
TCGACTTTCTGGAAGCCAAGGGCTACAAAGAAGTGA AAAAGGCACTGATCATCAAGCTGCCTAAGTACTCCCTGTTCGAGCTGGAAAAC  
GGCCGGAAGAGAAATGCTGGCCTTCGCCGGCAACTGCAGAAGGGAAACGAACCTGGCCCTCCAAATATGTGAACCTCCTGTACCT  
GGCCAGCCACTATGAGAAGCTGAAGGGCTCCCCGAGGATAATGAGCAGAAAACAGCTGTTTGTGGAACAGCACAAGCACTGGAGC  
AGATCATCGAGCAGATCAGCGAGTTCTCCAAGAGAGTGATCCTGGCCGACGCTAATCTGGACAAAAGTGTGTCCGCCTACAACAAGCAC  
CGGGATAAGCCCATCAGAGAGCAGGCCaAGAATATCATCCACCTGTTTACCCTGACCAATCTGGGAGCCCCTGCCGCCTTCAAGTACTT  
TGACACCACCATCGACCGGAAGAGGTACACCAGCACC AAAGAGGTGCTGGACGCCACCCTGATCCACCAGAGCATCACC GGCCGTGTACG  
AGACACGGATCGACCTGTCTCAGCTGGGAGGCGACAAAAGGCCGGCCACGAAAAGGCCGGCCAGGCAAAAAAGAAAAAGGGATCA  
GGCAAGCTTGAGGGCAGAGGAAGTCTTCTAACATGCGGTGACGTGGAGGAGAATCCCGGCCCTGCTAGCGGTAGCGGCAGCGGTAGCAT  
GACCGAGTACAAGCCCACGGTGC GCCTCGCCACCCGCGACGACGTCCCCCGGGCCGTACGCACCCTCGCCGCCGCGTTCGCCGACTACC  
CCGCCACGCGCCACACCGTGCACCCGGACCGCCACATCGAGCGGGTCAACGAGCTGCAAGAACTCTTCCCTCACGCGCGTTCGGGCTCGAC  
ATCGGCAAGGTGTGGGTTCGCGGACGACGGCGCCGCGGTGGCGGTCTGGACCACGCCGGAGAGCGTGAAGCGGGGGCGGTGTTCCGCCGA  
GATCGGCCCGCGCATGGCCGAGTTGAGCGGTTC CCGGCTGGCCGCGCAGCAACAGATGGAAGGCCTCCTGGCGCCGACCCGGCCAAAGG  
AGCCCGCGTGGTTCTGGCCACCGCTCGGCGTCTCGCCGACCACCAGGGCAAGGGTCTGGGCAGCGCGTGTGTCTCCCGGAGTGGAG  
GCGGCCGAGCGCGCCGGGCTGCCGCCTTCTGGAGACTCCCGCCCGCAACCTCCCTTCTACGAGCGGCTCGGCTTCACCGTAC  
CGCCAGCTCGAGTGGCCCGAAGGACCGCGCACCTGGATGCTGACCCCGCAAGCCCGGTGCTTAATAGGACCCAGCTTTCTGTACAAAG  
TGGTGACGTAAGCTAGCAGGATCTTTGTGAAGGAACCTTACTTCTGTGGTGTGACATAATTGGACAAAACCTACAGAGATTTAAAGC  
TCTAAGGTAAATATAAAATTTTTAAGTGTATAATGTGTTAAACTACTGATTCTAATTTGTTTGTGATTTTTAGATTCCAACCTATGGAAC  
TGATGAATGGGAGCAGTGGTGAATGCCTTTAATGAGGAAAACCTGTTTTGCTCAGAAGAAATGCCATCTAGTGATGATGAGGCTACTG  
CTGACTCTCAACATTCTACTCCTCAAAAAAGAAGAGAAAGGTAGtGACCCCAAGGACTTTCTTTCAGAATTGCTAAGTTTTTTGAGT  
CATGCTGTGTTTTAGTAATAGAACTCTTGCTTTGCTTTGCTATTTACACCACAAAGGAAAAAGCTGC ACTGCTATAACAAGAAAATATGGA  
AAAATATTCTGTAACCTTTATAAGTAGGCATAACAGTTATAATCATAACATACTGTTTTTTCTTACTCCACACAGGCATAGAGTGTCTG  
CTATTAATAACTATGCTCAAAAATTTGTGTACCTTTAGCTTTTTAATTTGTAAAGGGGTTAATAAGGAATATTTGATGTATAGTGCCTTG  
ACTAGAGATCATAATCAGCCATAACCACATTTGTAGAGGTTTTACTTGTCTTTAAAAAACCTCCACACCTCCCCCTGAACTGAAACATA  
AAATGAATGCAATTTGTTGTTGTTAACTTGTTTATTGCAGCTTATAATGGTTACAAAATAAAGCAATAGCATCACAAAATTTACAAAATAAA  
GCATTTTTTTCACTGCATTCTAGTTGTGGTTTTGTCCAACTCATCAATGTATCTTATCATGTCTGGATCCCGTTTTAAACTACGCGTAAT  
TCAAACAGGGTTCTGGCGTTCGTTCTCGTACTGTTTTCCCGAGGCCAGTGTCTTAGCGTTATTGAAAAGGAAGAGTATGAGTATTCAAC  
ATTTCCGTGTCGCCCTTATTCCCTTTTTTTGCGGCAATTTGCTTCCCTTCTGTTTTTTGCTCACCCAGAAACGCTGGTGAAGTAAAGATGCT  
GAAGATCAGTTGGGTGCAGAGTGGGTTACATCGAACTGGATCTCAACAGCGGTAAGATCCTTGAGAGTTTTCGCCCCGAAGAACGTTTT  
TCCAATGATGAGCACTTTTAAAGTTCTGCTATGTGGCGCGGTATTATCCCGTATTGACCCGGGCAAGAGCAACTCGGTTCGCCGCATAC  
ACTATTCTCAGAATGACTTGGTTGAGTACTACCAGTACACAGAAAAGCATCTTACGGATGGCATGACAGTAAGAGAATTTATGCAGTGTCT  
GCCATAACCATGAGTGATAACACTGCGGCCA ACTTACTTCTGACAACGATCGGAGGACCGAAGGAGCTAACCGCTTTTTTGCACAACAT  
GGGGGATCATGTA ACTCGCCTTGATCGTTGGGAACCGGAGCTGAATGAAGCCATAACCAAACGACGAGCGTGACACCACGATGCCTGTAG  
CAATGGCAACAACGTTGCGCAA ACTATTA ACTGGCGAACTACTTACTCTAGCTTCCCGGCAACAATTAATAGACTGGATGGAGGCGGAT  
AAAGTTGCAGGACCACTTCTGCGCTCGGCCCTTCCGGCTGGCTGGTTTTATTGCTGATAAATCTGGAGCCGGTGAGCGTGGGTCTCGCGG  
TATCATTGCAGCACTGGGGCCAGATGGTAAGCCCTCCCGTATCGTAGTTATCTACACGACGGGGAGTCAGGCAACTATGGATGAACGAA  
ATAGACAGATCGCTGAGATAGGTGCCTCACTGATTAAGCATTTGGTAACTGTGACACCAAGTTTACTCATATATACTTTAGATTGATTTA  
AACTTTCATTTTTAATTTAAAAGGATCTAGGTGAAGATCCTTTTTTGATAATCTCATGACCAAAAATCCCTTAACGTGAGTTTTCGTTCCA  
CTGAGCGTCAGACCCCGTAGAAAAGATCAAAGGATCTTCTTGAGATCCTTTTTTTCTGCGCGTAATCTGCTGCTTGCAAACAAAAAAC  
CACCGCTACCAGCGGTGGTTTTGTTTTGCCGGATCAAGAGCTACCAACTCTTTTTCCGAAGGTA ACTGGCTTCAGCAGAGCGCAGATACCA  
AATACTGTTCTTCTAGTGTAGCCGTAGTTAGGCCACC ACTTCAAGA ACTCTGTAGCACC CGCTACATACCTCGCTCTGCTAATCCTGTT  
ACCAGTGGCTGCTGCCAGTGGCGATAAGTTCGTGCTTACC GGTTGGACTCAAGACGATAGTTACCGGATAAGGCGCAGCGGTTCGGGCT  
GAACGGGGGGTTCTGTGCACACAGCCCAGCTTGGAGCGAACGACCTACACCGAACTGAGATACTACAGCGTGAGCTATGAGAAAAGCGCC  
ACGCTTCCCGAAGGGAGAAAAGGCGGACAGGTATCCGGTAAGCGGCAGGGTTCGGAACAGGAGAGCGCACGAGGGGAGCTTCCAGGGGAAA  
CGCCTGGTATCTTTATAGTCTGTGCGGTTTTCGCCACCTCTGACTTGAGCGTTCGATTTTTGTGATGCTCGTCAGGGGGGCGGAGCCTAT  
GGAAAACGCCAGCAACGCGGCCTTTTTACGGTTCTGGCCTTTTTGCTGGCCTTTTTGCTCACATGTTCTTTCTGCGTTATCCCCTGAT  
TCTGTGGATAACCGTATTACCGCCTTTGAGTGAGCTGATACCGCTCGCCGAGCCGAACGACCGAGCGCAGCGAGTCA GTGAGCGAGGA  
GAAGA

pSL1180-HR-Aag2-loxP-Pub-RFP-loxP-3xFLAG-AGO1

AGO1 homology with silent mutations at sgRNA cleavage sites

loxP sites

aae PUb promoter

RFP

3xFLAG

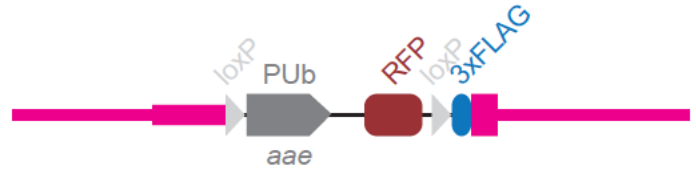

GCGCCCAATACGCAAACCGCCTCTCCCCGCGCGTTGGCCGATTTCATTAATGCAGCTGGCACGACAGGTTTTCCCGACTGGAAAGCGGGCA  
 GTGAGCGCAACGCAATTAATGTGAGTTAGCTCACTCATTAGGCACCCCAGGCTTTACACTTTTATGCTTCCGGCTCGTATGTTGTGTGGA  
 ATTGTGAGCGGATAACAATTTACACAGGAAACAGCTATGACCATGATTACGAATTCGACATGTAGGACATGTGGGGTAGTTCAGAAA  
 TCCAGATAAACGATGGACATTTGAATTATCCCCAAACCTCCATCATGTTCTGTACTTGATATCAACTCAAGGAACCCCGCACTAAAAT  
 TGAATTTTATGGCTACTATGATAACCGTGTAAACCGTTTTCTAAAAGTTTCTGTGCGATGACTCGTTACAAATGACGTTACAAATCTA  
 TAATTTCTATAAAATCCCTTCAAATGACTCTTGGAAATTTATCTGTATTAATAATATAAATATTTTAAAAGCTGGTAAATCACCAA  
 CATTTTGACATCCATTTATCCAGAATCGTTCTATTGTTTTATGCGGTGAATGCCGAAAAAATATACCTTCAATGATTCATTGCCGATG  
 TTTCAACTGAATCAAACCTAGAAATATGAAATTTTACGCATTTAGATAGATGACTACTCTTTTTTTCAGAGTTTTAGTTCACAGCAAAG  
 ATAAAAGGTAATTCAAATGAGAGCTGCTGTAGAAAGTTTCTCGCTCAATGTATGATCTCGCTTAAAGCCATTGGTAACCAAGTGTGTA  
 GCTTGTGTTACTACGCAAACGAATGGATTTACACGTTACTTAAAAATGCTACAATGAAGATTCTCTATCTCCAGTGGCGATAGTTAT  
 ATTTTGGTCCATTCATTTGCTTAAAAACAACGAGCTACACATCAATGGCTTTTAGATCGAGATCACAATTTATGCGAGATTTCTCAAG  
 TAATTTATTGCCAAGAAATTTCTGTGAATAATAATAATTATAATGATTATTCTGTTTCATGAGCGCATCCATTTTGGAGCGTCCGTA  
 TGAACAAAACGGTAAACCGCAACCTGGCTGTTTACTTGCAGCGTTTTTTCGGTACCTAAACTTGCCTACAAGTCAACTCGTCTAAAA  
 CATAACGCCTACCCAGGCTGCTGGTAGCGAAACGTTGGGGGGCGATGAAGAAAATTTGTCTCACTCGCCATCATAACGAGAGTTTCCGGA  
 CGAGTTCAGCAGACGTGCGTGTGTTAGCGCGACGACGAAAAGTGCAAAATTCGGCCGTAATTAGTTCGCTTCCGTTTTTCCGAGTGCCT  
 CCGATCGTTAGCGGACCGTTCCGGGTGTGATTTAAGCGTGAAATAACTTCGTATAATGTATGCTATACGAAGTTATATCTTTACATG  
 TAGCTTGTGCATTGAATCCAATTATAATTTGCCTTGGCACCAGCTGAGCCAGACAAGAAAGAAAGCTTCCAGAAATATATCGATTTAG  
 AAGGGTTGACGTCATTGCTGACTGCACTAATACAGCAAATGATGCAATTAGAATGATTCAAGTGAATTTCCCAAATTAATGATTTTTT  
 TCTGGATTTGGTTATCAGATTACATTCGAAGCTAAGATTAGCTACCGAAATTTGTCGATCAAATCAGGAAATCCTTTCTCTATCGAAAA  
 GGCATTCGCACATCTTCTCTCTATGCCATATACACGAAGGGTAGGTACATTGACGCTTTTGGCAGAAGTTGAACTGCATCGTTCAAGG  
 TACAGAATGAACGACTAACAGACACAAGCAGTTTTGCTGTCCATTAGACACAGGGATGGTACCCATATTCGATCGATATAGAGCCAT  
 CCAACCGAACAGAGGTATATGTATGAATGTATTGCTGAAATTTTCTAGAAGTACAACCACCACTACGACAGTGTCTATAAAACGCCCC  
 GCAAAGCGAAACAGCTCAATCGAATACGTTTCTAGTGGAGTGAACATTACGCGGCCAAAGTAAGCAGTGCCAGTGAAGTGAAGTGA  
 AAGTCTTAGTGAAGAAAGATGATCAATTAGCCAGAGGAGAAAATTTAGAGTGAACAAAGCTTTATTCAAAGGACAATTAATTAATA  
 ATTGGTGAAGTGCATTTCCGGTGAAGGAAATCTTCTAGTGAAGGTAGGTAATAATTAATGATGAAATTAATAGTAAATGAGTAAAGT  
 TTGGTGAATGATTCCTTTGCTTTGAAATGAGCAAATCTTTTCCAAGATGGCGACTATTGAGCTTTGAGTATTAGTGAAGAAATTTGCAA  
 CGCAGTTTTCATCATATTGATAAAACCAATTTGTGATTCACAGCGATAATCATATTTTCTGTTGAATCATCGCTACTAATTGAATTA  
 TCTAGAATAATAAGAATAACGATTTTGTCCGTCACATATCTAAAATAAATATTTTGTAGGTTAATTACCCATTAAGGTAATATTAACA  
 CATATCGAGAAAAACCTTGGAGAAATCGTGAAGAACTTGAAGATACGCAATTTCAAACCTACGTAGTTCAAAGTGAAGAAACAAGTTA  
 TTTCACTTAAAAGTAGGGCGTTGTTGTGACGTCATCACCTTCAAGTGTATATTTTCACTTGGCCTGCGACTGCAAACGCAGACAAAGC  
 AAAACAAGTTTAAAACCTGTCGTGTCGTGCTCGAAGCCAAAGGCAATGAATCAATATCAAATGAGAGTTTGCATTTCAACAACCAATT  
 TCAAGCGTTTTCTCGTTTTCTTTTTCTGCTCAACAGAGATTTCAACACCAAGCTCGATAAGCTTGTTCGAATCTCGAGTGCAGCGCTTCCG  
 GAGGTATACACCTAGGCGGTACCCTGCAGTGAATTCGGAGCTCTACCGCGGCCGCATGAGCGAGCTGATCAAGGAGAATGCACATG  
 AAGCTGTACATGGAGGGCACCGTGAACAACCACCTTCAAGTGCACATCCGAGGGCGAAGGCAAGCCCTACGAGGGCACCCAGACCAT  
 GAAGATCAAGGTGGTCGAGGGCGGCCCTCTCCCTTTCGCTTTCGACATCCTGGCTACCAGCTTCATGTACGGCAGCAAAGCCTTCATCA  
 ACCACACCCAGGGCATCCCCGACTTCTTTAAGCAGTCTTCCCTGAGGGCTTACATGGGAGAGAATCACCACATACGAAGACGGGGGC  
 GTGCTGACCGCTACCCAGGACACCAGCTTCCAGAACGGCTGCATCATCTACAACGTCAAGATCAACGGGGTGAACTTCCCATCCAACGG  
 CCCTGTGATGCAGAAGAAAACACGCGGCTGGGAGGCCAACCCGAGATGCTGTACCCCGCTGACGGCGGCCTGAGAGGCCACAGCCAGA  
 TGGCCCTGAAGCTCGTGGGCGGGGGCTACCTGCACTGCTCCTTCAAGACCACATACAGATCCAAGAAACCCGCTAAGAACCTCAAGATG  
 CCCGGCTTCCACTTCGTGGACCACAGACTGGAAAGAATCAAGGAGGCCGACAAAGAGACCTACGTCGAGCAGCAGAGATGGCTGTGGC  
 CAAGTACTGCGACCTCCCTAGCAAATGGGGCACAGATAAATAAATAACTTCGTATAATGTATGCTATACGAAGTTATATGGATTA  
 CAAGGATCACGATGGAGATTACAAGGATCACGATATCGATTACAAGGATGATGATAAGTATCCGGTGGTCAACGTAAGTACCGTTCC  
 GGACGTTTTGAAAAAGTGCAATTCACAAGAGAAGAAAAAAAaGTGTTGgCGAGGGGACCTTCTTCTCCCTCTCTCTCTCTCTCTCT  
 GTGTAATAATTTCTTCCCCATGTGTGTAATTTTCTGGCCTGCTGCTCTGTTTTGGTGCTTCTCTGGACGTTTTTGTGCGTGTGcGTTG  
 GTGTGATGGGGGCTTTTTCTGTGTACGGACGAAGAATTTGTGTGCGTGTGCGTGTGAGATGAGGCCCTCGCCAGAATGAAAATAAAC  
 CTCATCAACAATGAAAAGTGTCAACACTTTATGGAATAAAAAACGTTTTTATGCAGAAGAGCATGTGAATTATGTATCACTTGGCGATG  
 GAATTGGGAACATTGATGCTTCCGGACCGATGGAATAATGGAAAACAGATGTTTCTGCACGTTCTTTGGCACCTTGGCAATGTGTACT  
 AATCAACACCTCCCTCGAAAAATATACTTGGTGTATCAGAATGTTTGTGTTTGTGAATAGTAGGTAGTTTCCGTGTGTGGGTGTGTGTCT  
 TTGCTAATCATCCTGCTCCAGAAAAAAGGAAAACCAATTTAATCATCATTTTTCTGCGGCTTCGGAGACTGATAAGAGGAATACA  
 ACTGTTTGCAAACAGTGGATTGAAAACAATGGATAGAAGTTTTATTGGTTCACTTCAGTTCTAAACAGCGGATCCATCTGAAAAGTTAT  
 ATGAAATTTGATCCCCCTTTTTCAGTGTGGGAAATTTATGCCTTTTGTGTCGCTCTTTGCTCACAACCTACATACGGAGATGCAGACAGAG  
 CTCGATTATGTTGGTGGTGTCTGTGTCGCTGGCCATCCGAGAATCGGAAACATCGTGCAGGATGGAACATGGAAGAAGAGGACGTTGTAG  
 GGTACCATTATGTATATGCGTTCCAGGCGACATCAGACGAGGTGGGTCTTCTCGAAATGATGGGTGGTTGACTGAGTAGCACCTGCTG  
 TTCATGTGCGGAAATGGAATAACGTGGAGATGCAATGTTCTTCAACGCTAGAAGGATTCGGGGGAGACGAAAAGCAAATCCGGTGGCGGC  
 CGCCTGCAGCTGGCGCCATCGATACGCGTACGTGCGGACCGCGGACATGTACAGAGCTCGAGAAGTACTAGTGGCCACGTGGGCCGTG

ACCTTAAGCTTGGCACTGGCCGTCGTTTTACAACGTCGTGACTGGGAAAACCTGGCGTTACCCAACCTAATCGCCTTGCAGCACATCC  
CCCTTTTCGCCAGCTGGCGTAATAGCGAAGAGGCCCGCACCGATCGCCCTTCCCAACAGTTGCGCAGCCTGAATGGCGAATGGCGCCTGA  
TGCGGTATTTTCTCCTTACGCATCTGTGCGGTATTTACACCCGCATACGTCAAAGCAACCATAGTACGCGCCCTGTAGCGGCGCATTAA  
GCGCGGGCGGGTGTGGTGGTTACGCGCAGCGTGACCGCTACACTTGCCAGCGCCCTAGCGCCCGCTCCTTTTCGCTTTCTTCCCTTCCCTT  
CTCGCCACGTTTCGCCGGCTTTCCCCGTCAGCTCTAAATCGGGGGCTCCCTTTAGGGTTCCGATTTAGTGCTTTACGGCACCTCGACCC  
CAAAAACTTGATTTGGGTGATGGTTCACGTAGTGGGCCATCGCCCTGATAGACGGTTTTTTTCGCCCTTTGACGTTGGAGTCCACGTTCT  
TTAATAGTGGACTCTTGTTCCAAACTGGAACAACACTCAACCCTATCTCGGGCTATTCTTTTGATTTATAAGGGATTTTGCCGATTTTCG  
GCCTATTGGTTAAAAAATGAGCTGATTTAACAAAAATTTAACGCGAATTTAACAAAAATTAACGTTTACAATTTTATGGTGCACCTCT  
CAGTACAATCTGCTCTGATGCCGCATAGTTAAGCCAGCCCCGACACCCGCCAACACCCGCTGACGCGCCCTGACGGGCTTGTCTGTCTCC  
CGGCATCCGCTTACAGACAAGCTGTGACCGTCTCCGGGAGTGCATGTGTGAGAGTTTTTACCCTCATCACCGAAACGCGCGAGACGA  
AAGGCCTCGTGATACGCCTATTTTTATAGGTTAATGTCATGATAATAATGGTTTTCTTAGACGTCAGGTGGCCTTTTCGGGGAAATGT  
GCGCGGAACCCCTATTTGTTTTATTTTTCTAAATACATTCAAATATGTATCCGCTCATGAGACAATAACCTGATAAATGCTTCAATAAT  
ATTGAAAAAGGAAGAGTATGAGTATTCAACATTTCCGTGTCGCCCTTATTCCCTTTTTTTCGCGCATTTTGCCTTCTGTTTTTGTCTCAC  
CCAGAAACGCTGGTGAAAGTAAAAGATGCTGAAGATCAGTTGGGTGCACGAGTGGGTACATCGAACTGGATCTCAACAGCGGTAAGAT  
CCTTGAGAGTTTTTCGCCCGAAGAAGTTTTCCAATGATGAGCACTTTTAAAGTTCTGCTATGTGGCGCGGTATTATCCCGTATTGACG  
CCGGGCAAGAGCAACTCGGTGCGCCGCATACACTATTCTCAGAATGACTTGGTTGAGTACTACCAGTCACAGAAAAGCATCTTACGGAT  
GGCATGACAGTAAGAGAATTATGCAGTGTGCCATAACCATGAGTGATAACACTGCGGCCAACTTACTTCTGACAACGATCGGAGGACC  
GAAGGAGCTAACCGCTTTTTTGCACAACATGGGGGATCATGTAACCTCGCCTTGATCGTTGGGAACCGGAGCTGAATGAAGCCATACCAA  
ACGACGAGCGTGACACCACGATGCCTGTAGCAATGGCAACAACGTTGCGCAAACCTATTAACCTGGCGAACTACTTACTCTAGCTTCCCGG  
CAACAATTAATAGACTGGATGGAGGCGGATAAAGTTGCAGGACCACTTCTGCGCTCGGCCCTTCCGGCTGGCTGGTTTTATTGCTGATAA  
ATCTGGAGCCGGTGAGCGTGGGTCTCGCGGTATCATTGCAGCACTGGGGCCAGATGGTAAGCCCTCCCGTATCGTAGTTATCTACACGA  
CGGGGAGTCAGGCAACTATGGATGAACGAAATAGACAGATCGCTGAGATAGGTGCCTCACTGATTAAGCATTGGTAACTGTCAGACCAA  
GTTTACTCATATATACTTTAGATTGATTTAAAACCTTCATTTTTAATTTAAAAGGATCTAGGTGAAGATCCTTTTTTGATAATCTCATGAC  
CAAAATCCCTTAACGTGAGTTTTTCGTTCCACTGAGCGTCAGACCCCGTAGAAAAGATCAAAGGATCTTCTTGAGATCCTTTTTTTCTGC  
GCGTAATCTGCTGCTTGCAAACAAAAAAACCACCGCTACCAGCGGTGGTTTTGTTTGCCGGATCAAGAGCTACCAACTCTTTTTCCGAAG  
GTAACCTGGCTTACAGCAGAGCGCAGATACCAAATACTGTTCTTCTAGTGTAGCCGTAGTTAGGCCACCACTTCAAGAACTCTGTAGCACC  
GCCTACATACTCGCTCTGCTAATCCTGTTACCAGTGGCTGCTGCCAGTGGCGATAAGTCGTGTCTTACCAGGTTGGACTCAAGACGAT  
AGTTACCGGATAAAGGCGCAGCGGTGGGCTGAACGGGGGTTTCGTGCACACAGCCAGCTTGGAGCGAACGACCTACACCGAACTGAGA  
TACCTACAGCGTGAGCTATGAGAAAGCGCCACGCTTCCCGAAGGGAGAAAGGCGGACAGGTATCCGGTAAGCGGCAGGGTCGGAACAGG  
AGAGCGCACGAGGGAGCTTCCAGGGGGAAACGCCTGGTATCTTTATAGTCTGTGCGGTTTTCGCCACCTCTGACTTGAGCGTCGATTTT  
TGTGATGCTCGTCAGGGGGGCGGAGCCTATGGAAAAACGCCAGCAACGCGGCCTTTTTACGGTTCCTGGCCTTTTGTGGCCTTTTGTCT  
CACATGTTCTTTCTGCGTTATCCCTGATTCTGTGGATAACCGTATTACCGCCTTTGAGTGAGCTGATACCGCTCGCCGCAGCCGAAC  
GACCGAGCGCAGCGAGTCAGTGAGCGAGGAAGCGGAAGA
